# Supplementary material for: PD-L1- and IL-4-expressing basophils promote pathogenic accumulation of T follicular helper cells in lupus
Source: PubMed Central journal article supplement (PMC11035650; doi:10.1038/s41467-024-47691-w), 2024-04-22
Supplement: 41467_2024_47691_MOESM1_ESM.pdf [file 41467_2024_47691_MOESM1_ESM.pdf]

# PD-L1- and IL-4-expressing basophils promote pathogenic accumulation of T follicular helper cells in lupus.

## SUPPLEMENTARY INFORMATION

**Authors:** John TCHEN <sup>1,2\*</sup>, Quentin SIMON <sup>1,2,3\*</sup>, Léa CHAPART <sup>1,2</sup>, Morgane K. THAMINY <sup>1,2</sup>, Shamila VIBHUSHAN <sup>1,2</sup>, Loredana SAVEANU <sup>1,2</sup>, Yasmine LAMRI <sup>1,2</sup>, Fanny SAIDOUNE <sup>1,2</sup>, Emeline PACREAU <sup>1,2</sup>, Christophe PELLEFIGUES <sup>1,2</sup>, Julie BEX-COUDRAT <sup>1,2</sup>, Hajime KARASUYAMA <sup>4</sup>, Kensuke MIYAKE <sup>4</sup>, Juan HIDALGO <sup>5</sup>, Padraic G. FALLON <sup>6</sup>, Thomas PAPO <sup>1,2,7</sup>, Ulrich BLANK <sup>1,2</sup>, Marc BENHAMOU <sup>1,2</sup>, Guillaume HANOUNA <sup>1,2,8</sup>, Karim SACRE <sup>1,2,7</sup>, Eric DAUGAS <sup>1,2,8</sup> and Nicolas CHARLES <sup>1,2†</sup>

<sup>1</sup> Université Paris Cité, Centre de Recherche sur l'Inflammation, INSERM UMR1149, CNRS EMR8252, Faculté de Médecine site Bichat, 75018, Paris, France

<sup>2</sup> Université Paris Cité, Laboratoire d'Excellence Inflamex, 75018, Paris, France

<sup>3</sup> Inovarion, 75005, Paris, France

<sup>4</sup> Inflammation, Infection and Immunity Laboratory, TMDU Advanced Research Institute, Tokyo Medical and Dental University (TMDU), Tokyo, Japan

<sup>5</sup> Universidad Autonoma de Barcelona, Facultad de Biociencias, Unidad de Fisiologia Animal Bellaterra, Bellaterra Campus 08193, Barcelona, Spain

<sup>6</sup> School of Medicine, Trinity College Dublin, Dublin 2, Ireland.

<sup>7</sup> Service de Médecine Interne, Hôpital Bichat, Assistance Publique – Hôpitaux de Paris, 75018, Paris, France

<sup>8</sup> Service de Néphrologie, Hôpital Bichat, Assistance Publique – Hôpitaux de Paris, 75018, Paris, France

\* Co-first authors

### †Corresponding author:

Nicolas Charles, PhD

Centre de Recherche sur l'Inflammation, INSERM UMR1149, CNRS EMR8252,  
Université Paris Cité, Faculté de Médecine site Bichat,  
16 rue Henri Huchard, 75018 Paris, France.

Phone: +33 157277306

E-mail: [nicolas.charles@inserm.fr](mailto:nicolas.charles@inserm.fr)

ORCID : [0000-0002-5416-5834](https://orcid.org/0000-0002-5416-5834)

## Supplementary Figure 1

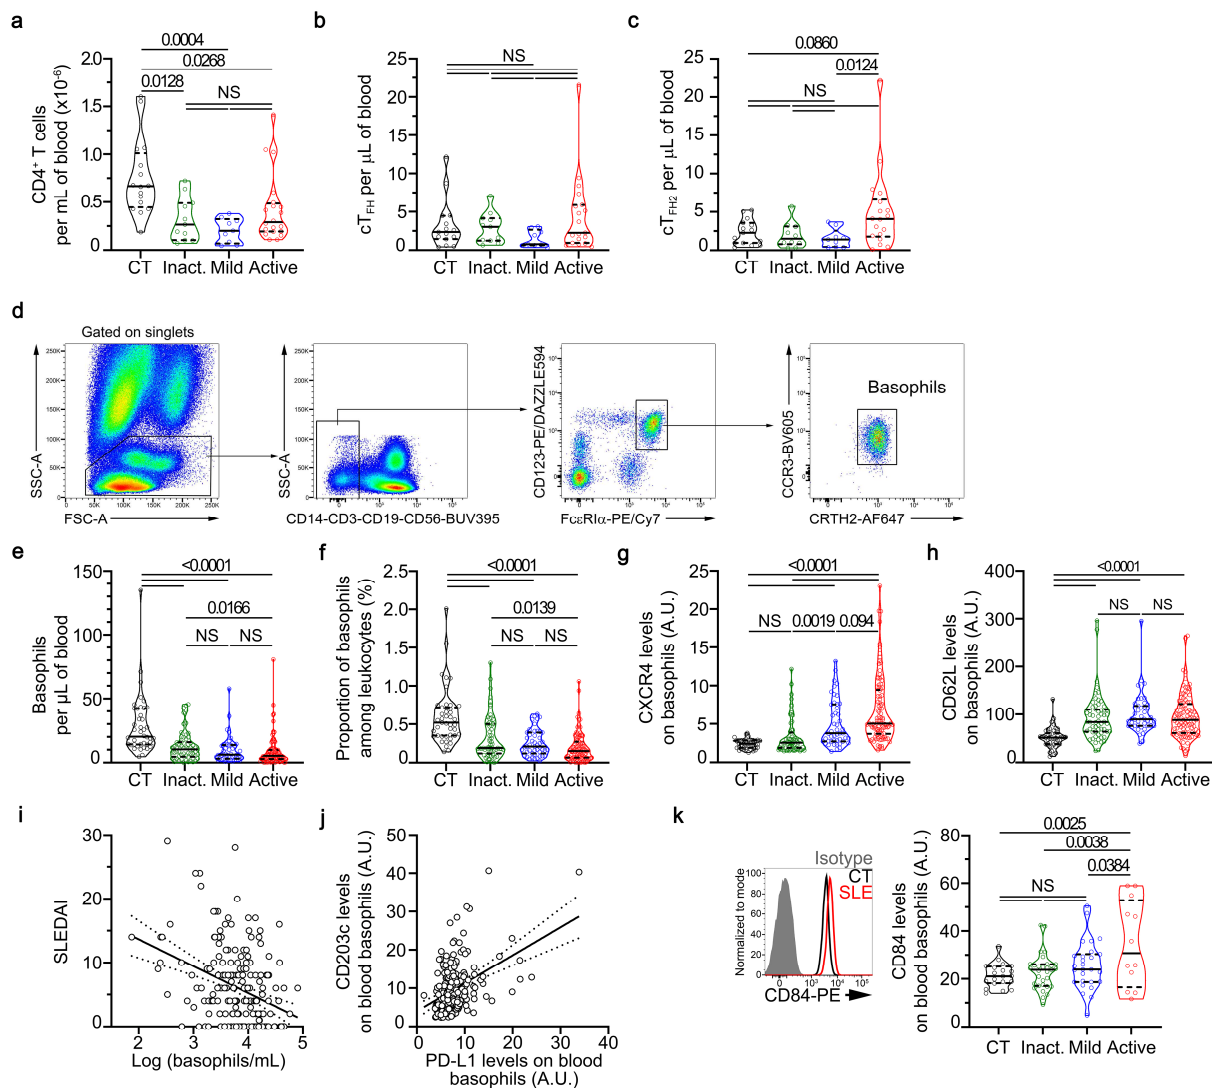

### Supplementary Fig. 1: Activated phenotype of basophils in SLE patients

(a-c) Absolute number of CD4<sup>+</sup> T cells (a), cTFH cells (b) and cTFH2 cells (c) per volume of blood in samples from healthy controls (CT) and inactive (inact.), mild or active SLE patients (n= 16/10/12/20, respectively) was determined by flow cytometry as described in Fig. 1a. (d) Flow cytometry gating strategy used to define basophils in human blood samples. Basophils were defined as SSC<sup>lo</sup>CD14<sup>-</sup>CD3<sup>-</sup>CD19<sup>-</sup>CD56<sup>-</sup>CD123<sup>+</sup>FceRI $\alpha$ <sup>+</sup>CCR3<sup>+</sup>CRTH2<sup>+</sup> cells. (e) Absolute number of basophils per  $\mu$ L of blood in samples from healthy controls (CT) and inactive (inact.), mild or active SLE patients (n= 42/61/47/96, respectively) was determined by flow cytometry as described in (d). (f) Proportions (%) of basophils among leukocytes in blood samples as described in (d,e) (n= 43/61/47/98). (g) CXCR4 expression levels on blood basophils as described in (d,e) (n= 43/61/47/98, respectively) as determined by flow cytometry. (h) CD62L expression levels on blood basophils as described in (d,e) (n= 43/59/44/98, respectively) as determined by flow cytometry. (i) Correlation (and linear regression with 95% confidence intervals) between Log (basophil numbers per mL of blood) and SLEDAI (Spearman  $r = -0.3320$ ,  $p < 0.0001$ , n= 201). (j) Correlation (and linear regression with 95% confidence intervals) between basophil CD203c and

PD-L1 expression levels (Spearman  $r=0.3113$ ,  $p < 0.0001$ ,  $n = 204$ ). **(k) Left**, Representative FACS analysis of CD84 expression levels on blood basophils from a healthy control (CT, black line), a patient with active SLE (red line), and isotype control staining (grey filled histogram). **Right**, CD84 expression levels on blood basophils from healthy controls (CT) and inactive (inact.), mild or active SLE patients ( $n = 20/31/27/12$ , respectively) as determined by flow cytometry. **(a-c, e-h, k)** Data are presented as violin plots with median (solid line) and quartiles (dotted lines). Statistical analyses were Kruskal-Wallis tests followed by Dunn's multiple comparisons tests.  $P$  values are shown above each bracket. NS: not significant. A.U. arbitrary units. Source data are provided in the Source Data file.

## Supplementary Figure 2

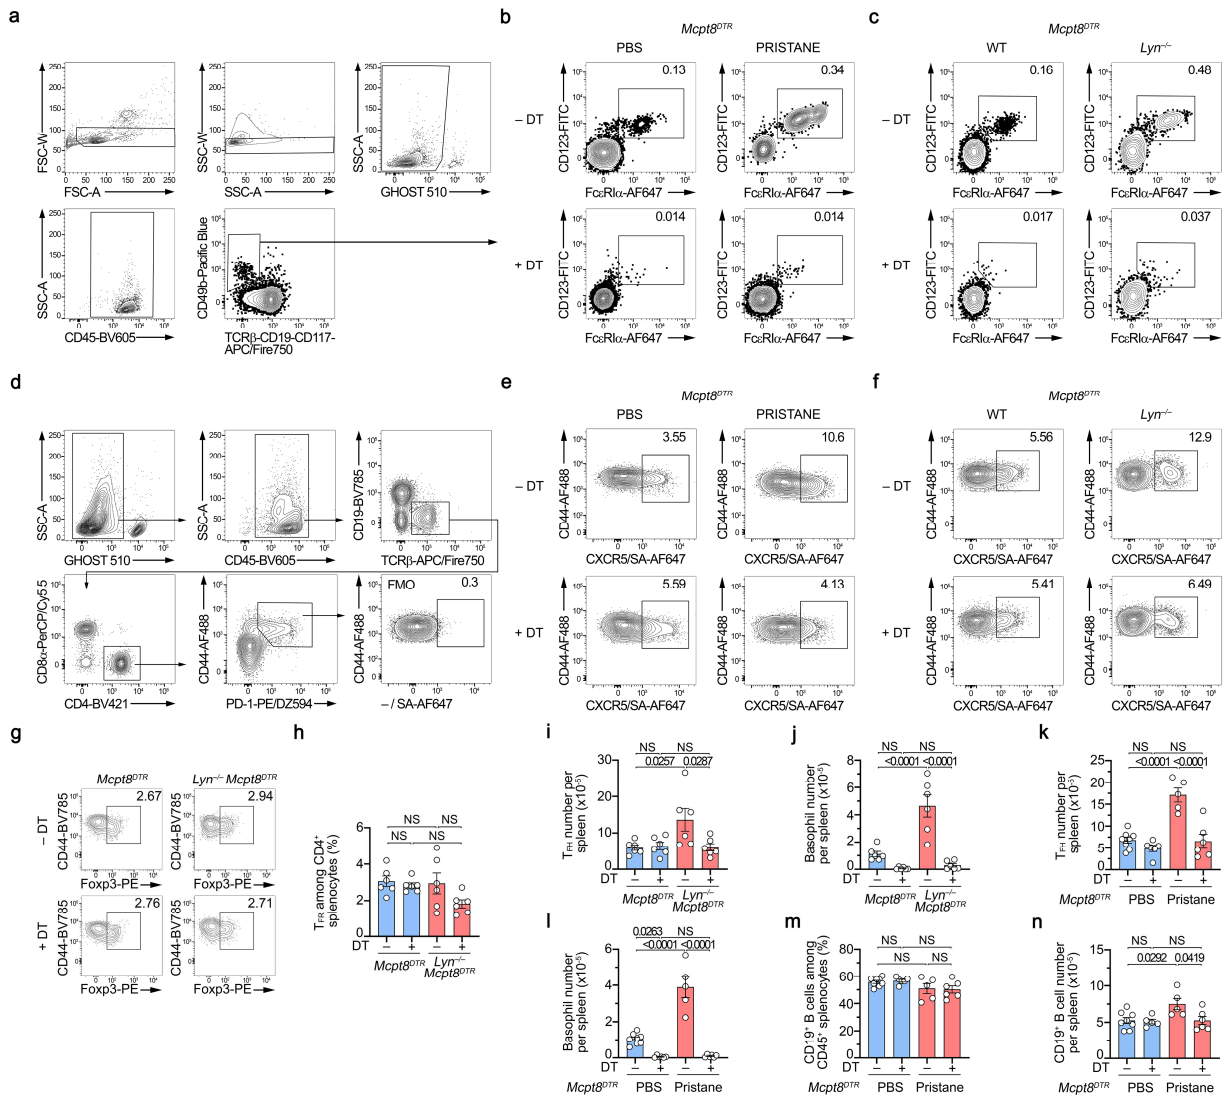

### Supplementary Fig. 2 : Basophil and TFH gating strategy and effects of DT injection in lupus-like mouse models on *Mcpt8<sup>DTR</sup>* background

(a) Contour plots showing the gating strategy used to define basophils prior to the final step shown in (b,c). (b,c) Representative contour plots showing gating and proportions of basophils (defined as CD45<sup>+</sup> TCRβ<sup>-</sup> CD19<sup>-</sup> CD117<sup>-</sup> CD49b<sup>+</sup> CD123<sup>+</sup> FcεR1α<sup>+</sup> cells) among CD45<sup>+</sup> splenocytes in *Mcpt8<sup>DTR</sup>* mice PBS- or pristane-injected (b) and in aged *Mcpt8<sup>DTR</sup>* (WT) and *Lyn<sup>-/-</sup> Mcpt8<sup>DTR</sup>* (*Lyn<sup>-/-</sup>*) mice (c) basophil-depleted (+DT) or not (-DT). Gating strategy used in **Fig. 2a,b,e,f** and **Fig. 3q-u**. (d-f) Contour plots showing the gating strategy and proportions of TFH cells (defined as CD45<sup>+</sup> CD19<sup>-</sup> TCRβ<sup>+</sup> CD8α<sup>-</sup> CD4<sup>+</sup> CD44<sup>+</sup> PD-1<sup>+</sup> CXCR5<sup>+</sup> cells) among spleen CD4<sup>+</sup> T cells (e,f) from mice as described in (b,c). CXCR5 positivity was determined on the fluorescence minus one (FMO, d). Gating strategy used in **Fig. 2c,d,l**; **Fig. 3a-f,k-p**; **Fig. 4a-i**; **Fig. 6a**; **Fig. 7a** and **Fig. 8g** as well as in **Supplementary Fig. 3c,f**; **4 b,c**; **6a-d**; **7a,e-l**; **8f**; **9a,b** and **11e**. (g) Representative contour plots showing gating and proportions of regulatory TFH cells (TFR) (defined as Foxp3<sup>+</sup> TFH cells) among spleen CD4<sup>+</sup> T cells from mice as described in **Fig. 2d**. (h) Proportions (%) of TFR among CD4<sup>+</sup> splenocytes in mice as in (f) (n = 6 per group). (i,j) Absolute numbers of TFH (i) and basophils (j) per spleen from mice as in (c) (n = 6 per group). (j,k) Absolute numbers of TFH (k) and basophils (l) per



spleen from mice as in **(b)** (n= 8/6/5/6). **(m,n)** Proportions among CD45<sup>+</sup> splenocytes (%) **(m)** (n= 8/6/5/6) and absolute numbers per spleen **(n)** (n= 8/5/5/6) of CD19<sup>+</sup> B cells from mice as in **(b)**. Results are from at least three independent experiments and presented as individual values in bars representing the mean values  $\pm$  s.e.m. Statistical analyses were done by two-way ANOVA test followed by Tukey's multiple comparisons test between the indicated groups. *P* values are shown above each bracket. NS: not significant. SA: streptavidin. Source data are provided in the Source Data file.

### Supplementary Figure 3

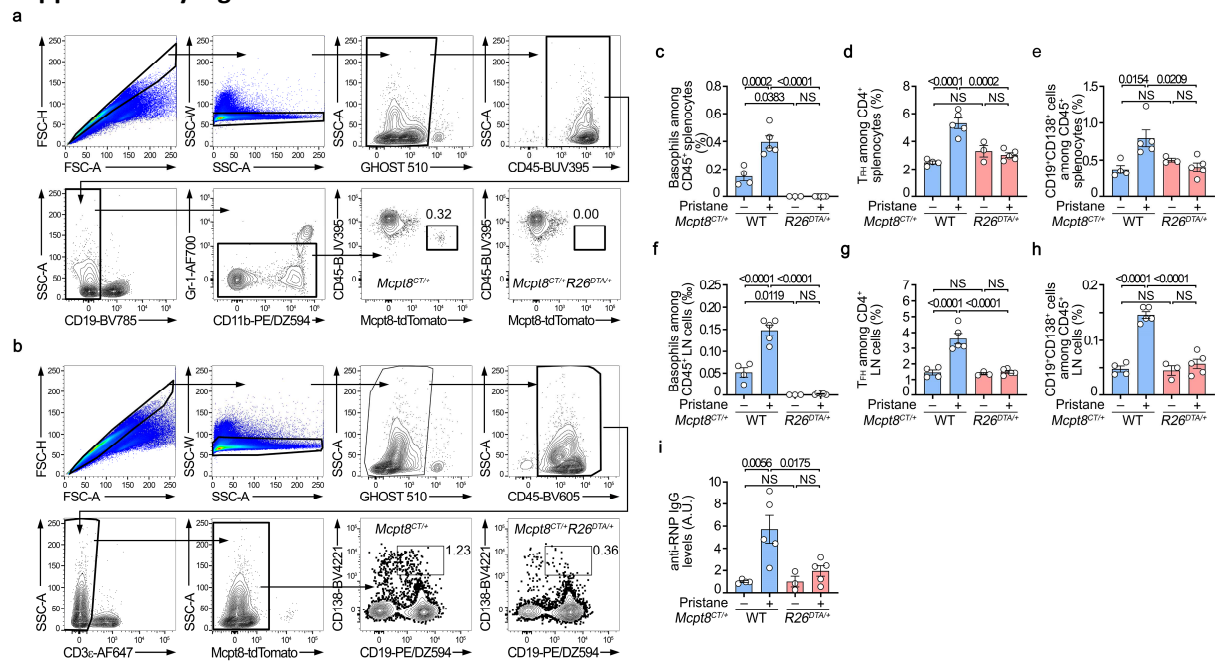

### Supplementary Fig. 3: Basophil-TFH functional relationship in lupus-like disease 24 weeks after pristane injection

(a) Gating strategy used to define basophils in *Mcpt8*<sup>CT/+</sup> and all mice bred with them. Gating strategy used in Fig. 5a,b,d-g; Fig. 6b,c; Fig. 7b,d; Fig. 8a and as well in Supplementary Fig. 3; 7b-d,k-n; and 8a,e. (b) Gating strategy used to define CD19<sup>+</sup>CD138<sup>+</sup> cells. Gating strategy used in Fig. 6e, Fig. 7c and Supplementary Fig. 3e,h. (c,d,e) Proportions (%) of basophils among CD45<sup>+</sup> splenocytes (c), of TFH among spleen CD4<sup>+</sup> T cells (d), and of CD19<sup>+</sup>CD138<sup>+</sup> cells among CD45<sup>+</sup> splenocytes (e) from *Mcpt8*<sup>CT/+</sup> (WT, blue) and basophil-deficient (*Mcpt8*<sup>CT/+</sup> *R26*<sup>DTA/+</sup>, red) mice analyzed 24 weeks after PBS or pristane (– or +, respectively) injections. (f,g,h) Proportions (%) of basophils among CD45<sup>+</sup> lymph node (LN) cells (f), of TFH among LN CD4<sup>+</sup> T cells (g), and of CD19<sup>+</sup>CD138<sup>+</sup> cells among CD45<sup>+</sup> LN cells (h) from the same mice as in (c,d,e). (i) Anti-RNP IgG plasma titers in mice as in (c,d,e) were quantified by ELISA. O.D. values at 450 nm were normalized to the mean of the PBS-injected mice of the same genotype. (c-i) Results are presented as individual values in bars representing the mean values ± s.e.m. (n = 4/5/3/5). Statistical analyses were done by two-way ANOVA followed by Tukey's multiple comparison tests between the indicated groups. *P* values are shown above each bracket. NS: not significant. A.U.: arbitrary units. Source data are provided in the Source Data file.

**Supplementary Figure 4**

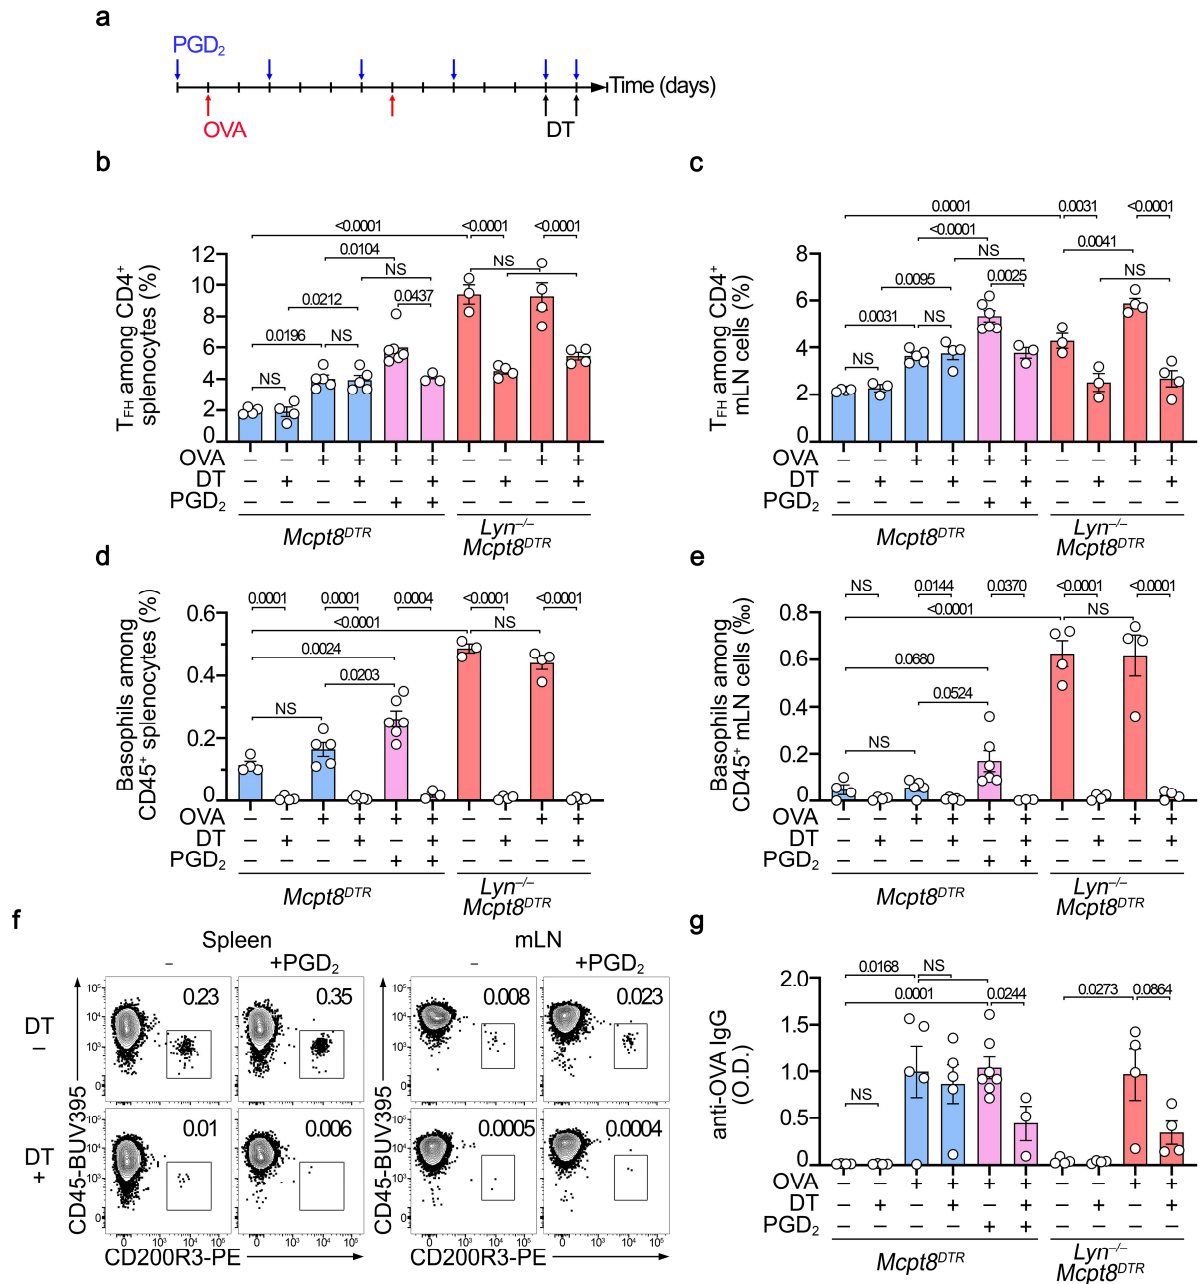

**Supplementary Fig. 4: Basophil contribution to ovalbumin immunization in healthy and lupus-like contexts**

(a) The immunization procedure was by intraperitoneal injection of 200  $\mu$ L of a 50/50 emulsion of Alum with 100  $\mu$ g of ovalbumin (OVA) diluted in PBS or with PBS alone for control mice on day 0 and day 7. Concerned mice were intraperitoneally injected with 20 nmoles of PGD<sub>2</sub> in 100  $\mu$ L of PBS on day -1, 3, 6, 9, 12 and 13. For DT-mediated basophil depletion, 1  $\mu$ g of DT (or PBS as a control) was injected intraperitoneally in 100  $\mu$ L of PBS on day 12 and day 13. Analysis was made on day 14. (b,c) Proportions (%) of TFH cells among CD4<sup>+</sup> T cells in spleen (b) (n= 4/4/5/5/6/3/3/4/4/4) or mesenteric lymph node (mLN) (c) (n= 4/3/5/4/6/3/3/3/4/4) from young (<16 weeks old) *Mcpt8<sup>DTR</sup>* not treated (blue bars) or

treated with PGD<sub>2</sub> (purple bars, +) or in *Lyn*<sup>-/-</sup>*Mcpt8*<sup>DTR</sup> (red bars) mice immunized with ovalbumin (OVA +) or not (OVA -) and basophil-depleted (DT +) or not (DT -) 48 hours before analysis. (d,e) Proportions (% or %) of basophils among CD45<sup>+</sup> cells in spleen (d) (n= 4/4/5/5/6/3/3/4/4/4) or mesenteric lymph node (mLN) (e) (n= 4/4/5/5/6/3/4/4/4/4) from the mice described in (b,c) as measured by flow cytometry as shown in (f). (f) This gating strategy was used in **Supplementary Fig. 4d,e; 7j; 11b,c,d** and in **Fig. 5d and 8d,e,f**. (g) Anti-OVA IgG plasma levels in mice described in (b,c) were determined by ELISA. The values presented are 450 nm optical density values (O.D.) (n= 4/4/5/5/7/3/4/4/4/4). (b-g) Results are from at least three independent experiments and presented as individual values in bars representing the mean values ± s.e.m. Statistical analyses were by one-way ANOVA test followed by Holm-Šidák's multiple comparisons test (b,c) or two-sided unpaired t tests (d,e,g) between the indicated groups. P values are shown above each bracket. NS: not significant. Source data are provided in the Source Data file.

Supplementary Figure 5

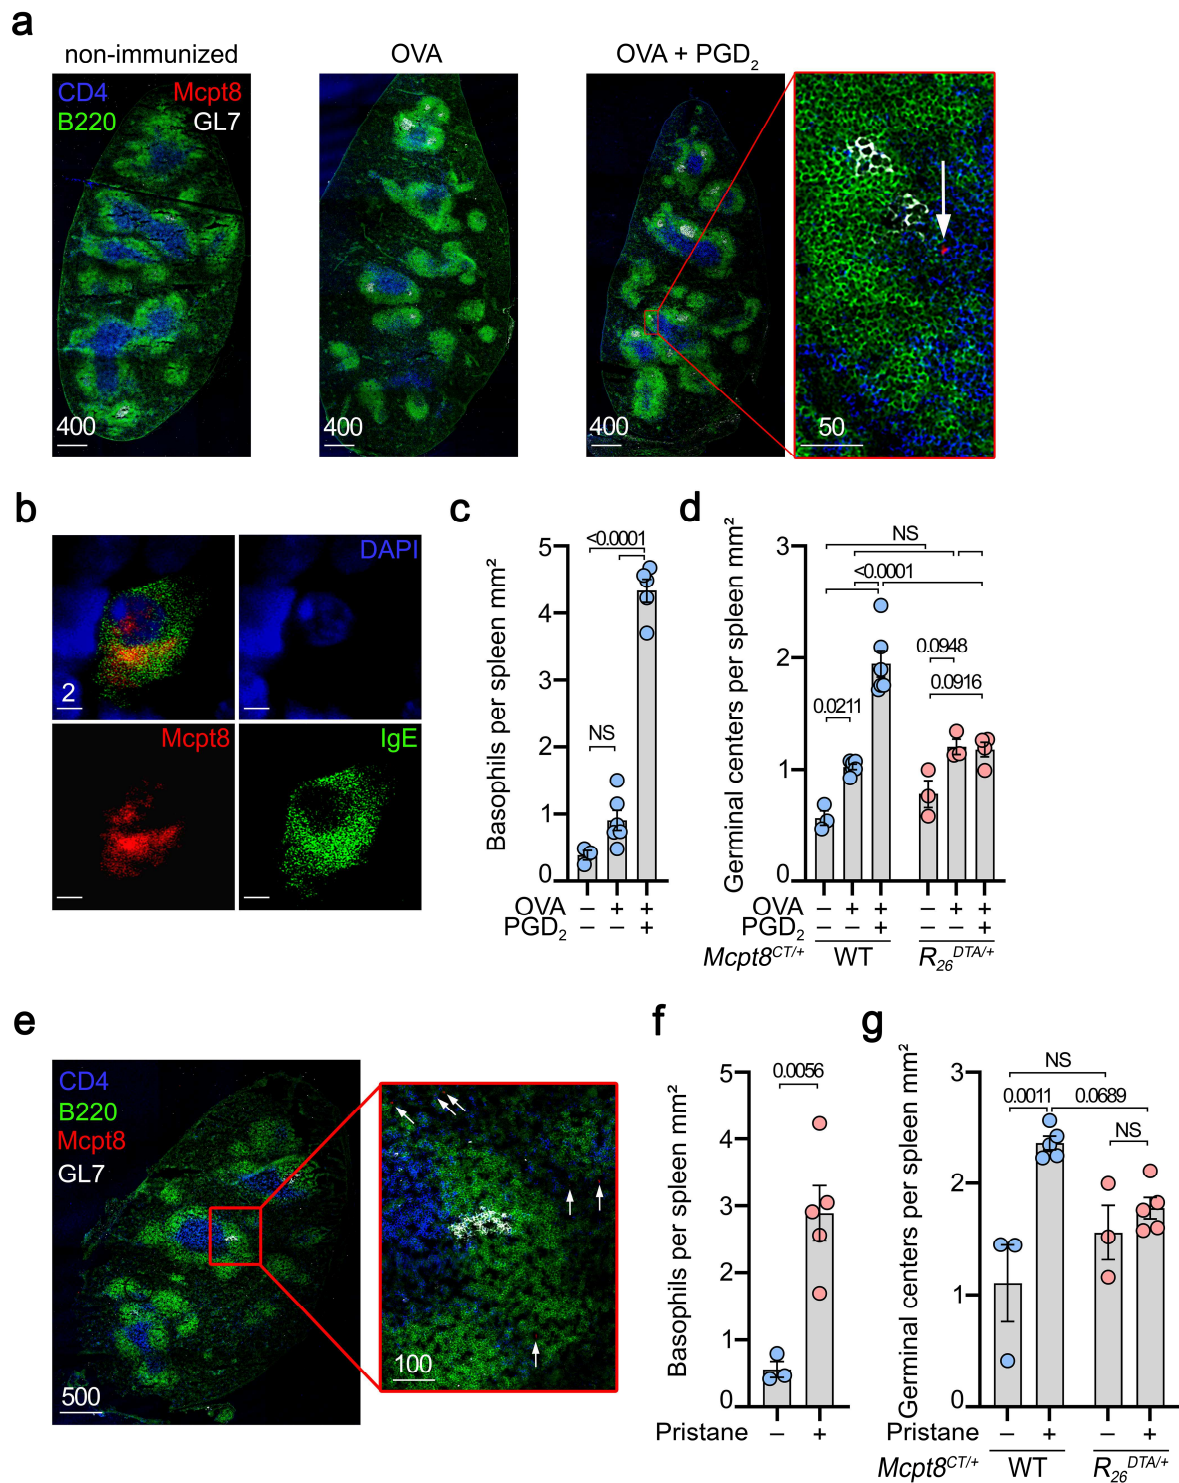

Supplementary Fig. S5: Spleen basophil and germinal center visualization in OVA-immunized mice  $\pm$  PGD<sub>2</sub> treatment and in pristane-treated mice

(a) Immunofluorescent staining of CD4 (blue, CD4<sup>+</sup> T cells), B220 (green, B cells), Mcpt8 (red, basophils) and GL7 (white, germinal centers) in spleen sections from *Mcpt8*<sup>CT/+</sup> mice non-immunized (left),

immunized with OVA (middle) or immunized with OVA and treated with PGD<sub>2</sub> (right) (scale bar = 400 μm), as described in supplementary Fig. S4a. A numerical zoom of the OVA+PGD<sub>2</sub> condition is shown on the right (scale bar = 50 μm) showing a germinal center (GL7, white) and a basophil (red) (indicated by an arrow) at the T:B border. **(b)** Immunofluorescent staining of nuclei (DAPI, blue), IgE (green), and Mcpt8 (red) in a spleen section from a *Mcpt8*<sup>CT/+</sup> mouse immunized with OVA and treated with PGD<sub>2</sub> showing that Mcpt8 staining is specific for basophils (scale bar = 2 μm). **(c)** Basophil numbers per mm<sup>2</sup> of spleen sections as depicted in **(a)** were quantified on 1 to 3 sections from at least two mice per group (n =3/6/5). **(d)** Germinal center numbers (defined as GL7<sup>+</sup> clusters) per mm<sup>2</sup> of spleen sections as depicted in **(a)** were quantified on 1 to 3 sections from at least two mice per group from *Mcpt8*<sup>CT/+</sup> and *Mcpt8*<sup>CT/+</sup>*R26*<sup>DTA/+</sup> (basophil-deficient) mice treated as described in **Supplementary Fig. 4a** (n =3/6/6/3/3/4). **(e)** Immunofluorescent staining as in **(a)** in a spleen section from a pristane-treated *Mcpt8*<sup>CT/+</sup> mice (scale bar = 500 μm). A numerical zoom of the indicated area is shown on the right (scale bar = 100 μm). White arrows show Mcpt8<sup>+</sup> (red) basophils. **(f)** Basophil numbers per mm<sup>2</sup> of spleen sections as depicted in **(e)** were quantified on 1 to 3 sections from at least two mice per group (PBS- and pristane-treated mice) (n =3/5). **(g)** Germinal center numbers per mm<sup>2</sup> of spleen sections as depicted in **(e)** were quantified on 1 to 3 sections from at least two mice per group from *Mcpt8*<sup>CT/+</sup> and *Mcpt8*<sup>CT/+</sup>*R26*<sup>DTA/+</sup> (basophil-deficient) mice treated with PBS (–) or pristane (+) (n =3/5/3/5). **(c,d,f,g)** Data are presented as individual values in bars representing the mean values ± s.e.m. **(c)** Statistical analyses were done by one-way **(c)** or two-way **(d,g)** ANOVA test followed by Tukey's multiple comparisons test between the indicated groups or by a two-sided unpaired Student's *t* test **(f)**. *P* values are shown above each bracket. NS: not significant. Source data are provided in the Source Data file.

**Supplementary Figure 6**

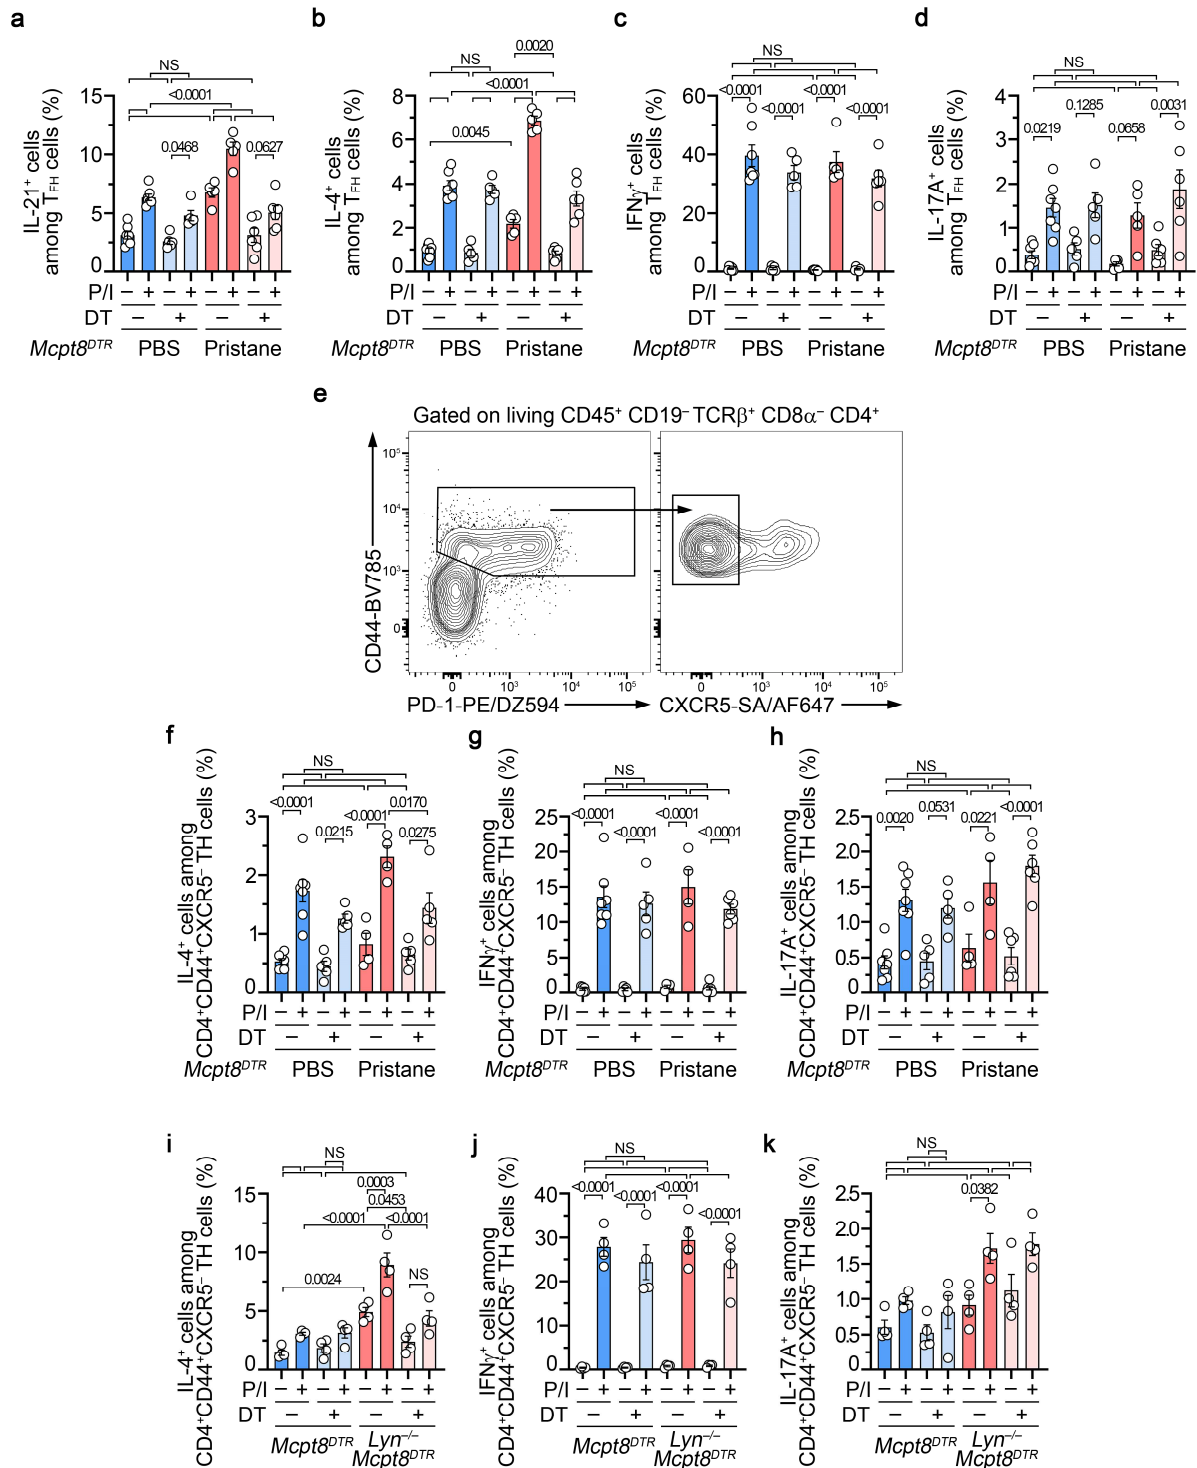

**Supplementary Fig. 6: IL-21, IL-4, IFN $\gamma$  and IL-17 A production by TFH cells and non-TFH CD4<sup>+</sup> T Helper cells in basophil-sufficient and basophil-depleted mice in the lupus-like context (related to Fig. 3).**

(a-d) Proportions (%) of IL-21 (a), IL-4 (b), IFN $\gamma$  (c) and IL-17A (d) producing cells among TFH cells in splenocytes stimulated with with P/I (+) or not (-) from PBS-injected (blue) and pristane-injected *Mcpt8*<sup>DTR</sup> mice (red), basophil sufficient (DT<sup>-</sup>, darker color) or basophil-depleted (DT<sup>+</sup>, lighter color) (n

=7/5/5/6). **(e)** Representative contour plots showing the CD4<sup>+</sup> effector T helper (TH) cells (non-TFH cells) gating strategy (defined as CD45<sup>+</sup> CD19<sup>-</sup> TCRβ<sup>+</sup> CD8α<sup>-</sup> CD4<sup>+</sup> CD44<sup>+</sup> CXCR5<sup>-</sup> cells) in splenocytes from a basophil-sufficient pristane-treated *Mcpt8<sup>DTR</sup>* mouse. **(f,g,h)** Proportions (%) of IL-4 **(f)**, IFNγ **(g)**, and IL-17A **(h)** producing cells among TH cells in splenocytes stimulated with PMA and Ionomycin (P/I +) or not (P/I-) from PBS-injected mice (blue bars) and pristane-injected *Mcpt8<sup>DTR</sup>* mice (red bars), basophil sufficient (DT-, darker color) or basophil-depleted (DT+, lighter color) (n =7/5/4/6). **(i,j,k)** Proportions (%) of IL-4 **(i)**, IFNγ **(j)**, and IL-17A **(k)** producing cells among TH cells in splenocytes stimulated with PMA and Ionomycin (P/I +) or not (P/I-) from aged *Mcpt8<sup>DTR</sup>* (blue bars) or *Lyn<sup>-/-</sup> Mcpt8<sup>DTR</sup>* (red bars) mice depleted in basophils (DT+, lighter color) or not (DT-, darker color) (n =4/4/4/4). **(a-k)** Results are from at least three independent experiments and presented as individual values in bars representing the mean values ± s.e.m. Statistical analyses were by two-way ANOVA test followed by Tukey's multiple comparisons tests between the indicated groups. *P* values are shown above each bracket. NS: not significant. SA: streptavidin. Source data are provided in the Source Data file.



### Supplementary Figure 7

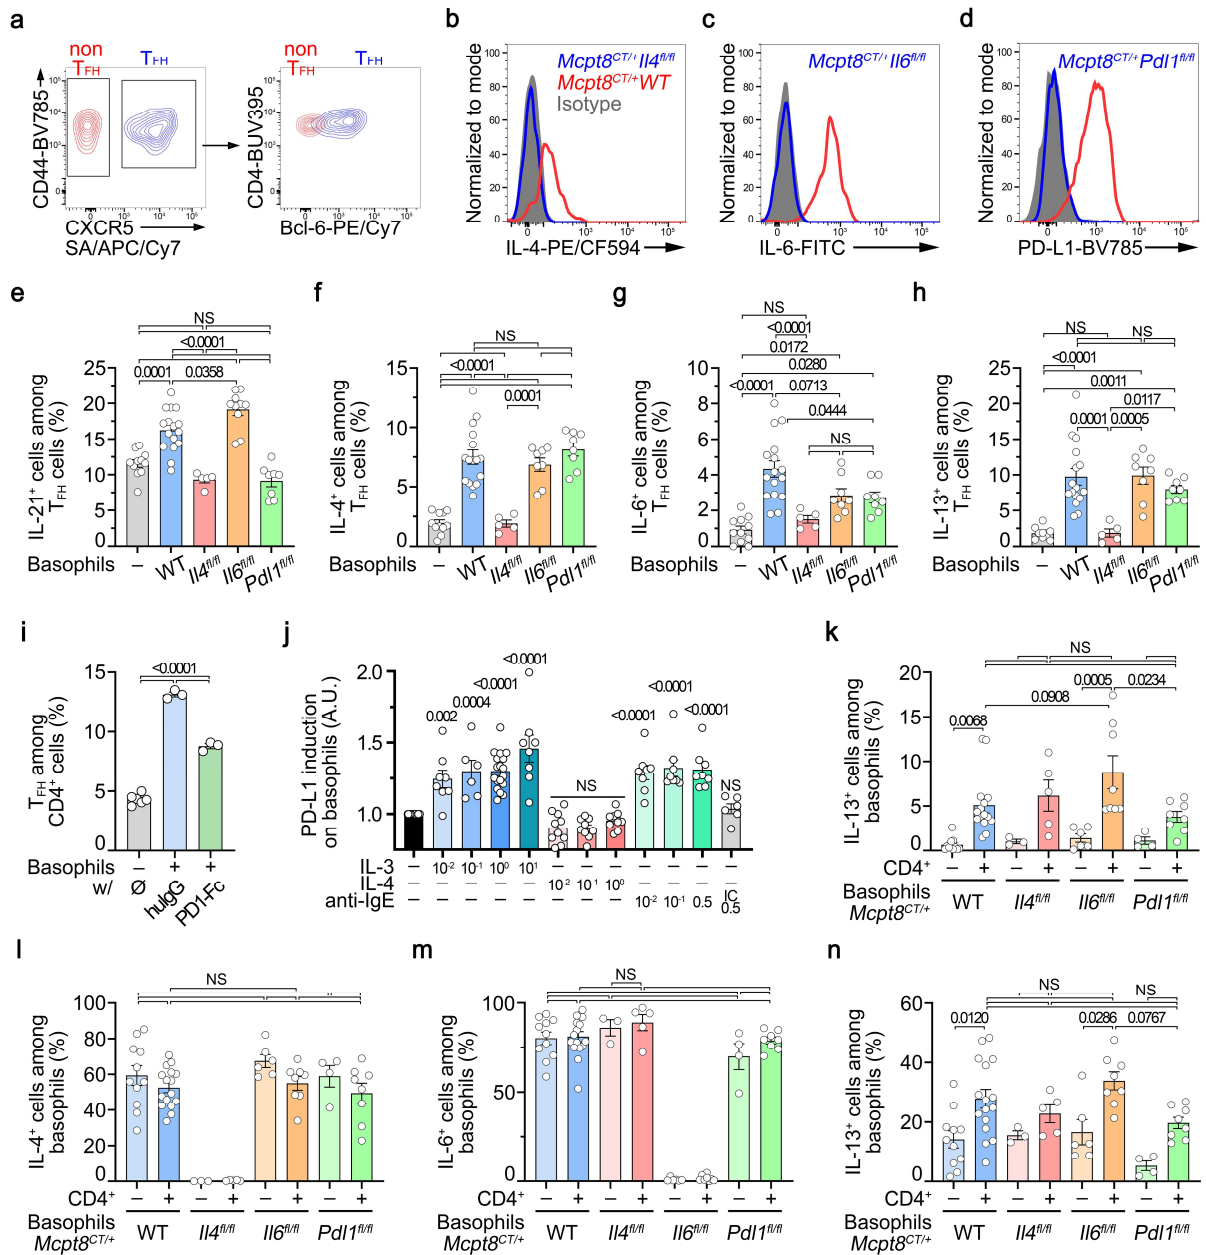

**Supplementary Fig. 7: Effective CRE-mediated floxed gene deletion in basophils and PMA-Ionomycin-induced cytokine production by basophils co-cultured or not with naïve CD4<sup>+</sup> T cells**

(a) Intracellular staining for Bcl6 expression in CD3/CD28 activated CD4<sup>+</sup>CD44<sup>+</sup>PD1<sup>+</sup> T cells expressing CXCR5 (TFH cells, blue) or not (non TFH cells, red) after 3 days of culture with WT basophils as described in Fig. 4. (b) Histogram plot showing IL-4 production by PMA and ionomycin stimulated spleen basophils from *Mcpt8*<sup>CT/+</sup>*Il4*<sup>+/+</sup> (WT, red) and *Mcpt8*<sup>CT/+</sup>*Il4*<sup>fl/fl</sup> (IL-4 deficient basophils, blue) mice. The isotype control signal is overlaid (grey-filled). (c) Histogram plot showing IL-6 production by PMA and Ionomycin stimulated spleen basophils from *Mcpt8*<sup>CT/+</sup>*Il6*<sup>+/+</sup> (WT, red) and *Mcpt8*<sup>CT/+</sup>*Il6*<sup>fl/fl</sup> (IL-6 deficient basophils, blue) mice. The isotype control signal is overlaid (grey-filled). (d) Histogram plot showing PD-L1

expression on spleen basophils from *Mcpt8<sup>CT/+</sup>Pdl1<sup>+/+</sup>* (WT, red) and *Mcpt8<sup>CT/+</sup>Pdl1<sup>fl/fl</sup>* (PD-L1 deficient basophils, blue). The isotype control signal is overlaid (grey-filled). **(e-h)** Proportions (%) of IL-21- **(e)**, IL-4- **(f)**, IL-6- **(g)**, and IL-13- **(h)** producing cells among TFH cells restimulated with PMA and ionomycin and brefeldin A for the last 4 hours of the culture from the same conditions as described in **Fig. 4a** (n= 11/16/5/8/8). **(i)** Proportions (%) of TFH among CD4<sup>+</sup> T cells after three days of culture without (–, ∅; grey filled) or with WT basophils in the presence of (w/) human IgG (blue) or mouse PD-1-hIgG Fc recombinant protein (green) (n= 6/3/3). **(j)** PD-L1 expression induction on WT basophils after stimulation of whole splenocytes with the indicated doses (in ng/mL) of IL-3 (blue), IL-4 (red), or anti-IgE (green) or isotype control (rat IgG1,κ; grey) for 2 hours. PD-L1 levels were normalized on the corresponding unstimulated (NS) condition for each sample and statistics against unstimulated condition are shown above each bar (n= 18/8/6/18/8/10/9/9/8/8/8/6). **(k)** Proportions (%) of spontaneous IL-13-producing cells among basophils of the indicated genotypes cultured as described in **Fig. 5b** (n= 11/15/3/5/6/8/4/8). **(l-n)** Proportions (%) of PMA and ionomycin-induced IL-4- **(l)**, IL-6- **(m)** and IL-13- **(n)** producing cells among basophils of the indicated genotypes cultured without (–, light colors) or with (+, dark colors) purified wild-type CD3/CD28 activated naïve CD4<sup>+</sup> T cells as described in **Fig 5** (n= 11/15/3/5/6/8/4/8). **(e-n)** Results are from at least three independent experiments and presented as individual values in bars representing the mean values ± s.e.m. **(e-n)** Statistical analyses were by one way ANOVA followed by Tukey's multiple comparisons tests between the indicated groups. *P* values are shown above each bracket. NS: not significant. Source data are provided in the Source Data file.

## Supplementary Figure 8

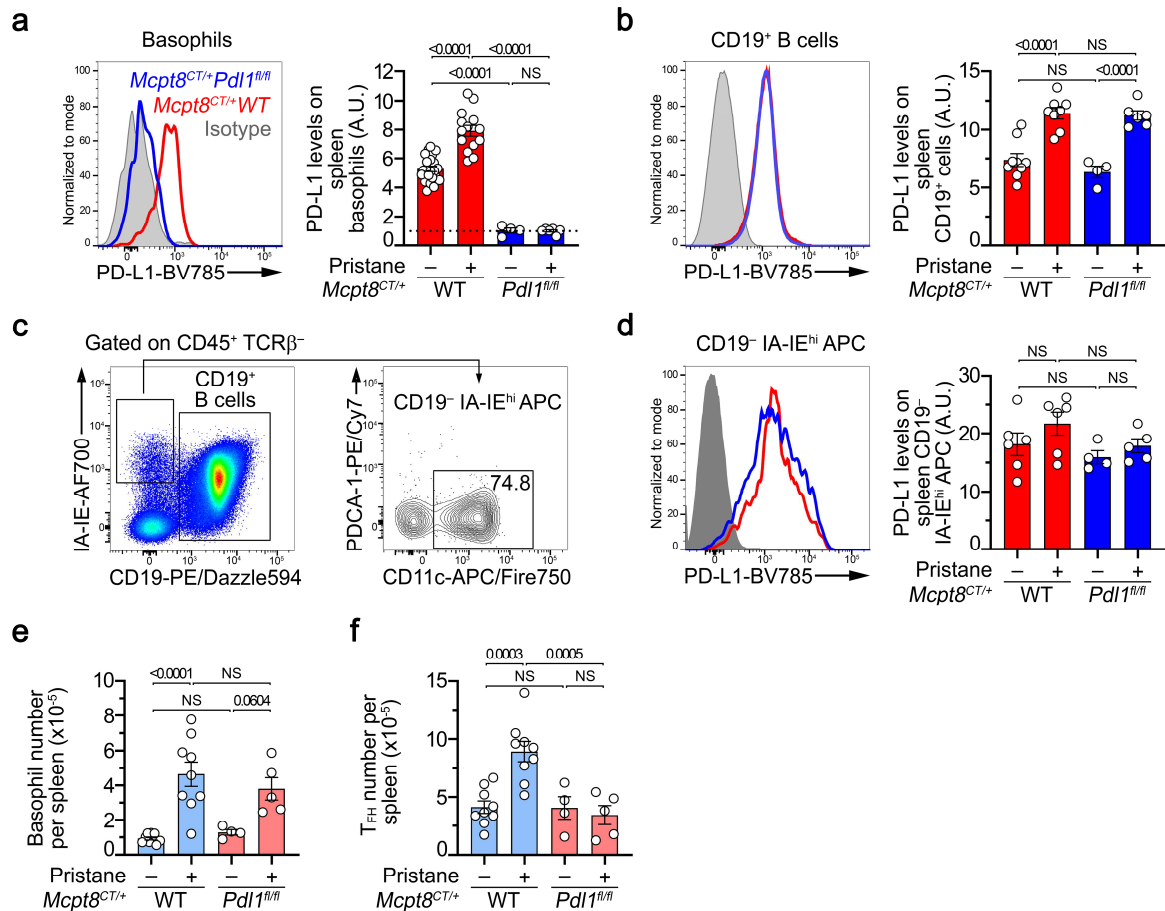

### Supplementary Fig. 8: CRE-mediated *Pdl1* floxed gene deletion selectively in the basophil compartment

(a) Left. FACS histogram plot showing PD-L1 expression on spleen basophils from *Mcpt8<sup>CT/+</sup>Pdl1<sup>fl/fl</sup>* (WT, red) and *Mcpt8<sup>CT/+</sup>Pdl1<sup>fl/fl</sup>* (*Pdl1<sup>fl/fl</sup>*, blue). The isotype control signal is overlaid (grey-filled). Right. PD-L1 expression quantification on spleen basophils from *Mcpt8<sup>CT/+</sup>* (WT) (red) or *Mcpt8<sup>CT/+</sup>Pdl1<sup>fl/fl</sup>* (*Pdl1<sup>fl/fl</sup>*) (blue) mice injected with PBS (-) or with pristane (+). ( $n = 22/14/3/5$ ) as determined by flow cytometry. For WT mice, same data as presented in Fig. 7a. (b) Left. FACS histogram plot showing PD-L1 expression on spleen CD19<sup>+</sup> cells from the same mice as in (a) gated as shown in (c). Right. PD-L1 expression quantification on spleen CD19<sup>+</sup> B cells from mice as in (a). ( $n = 9/8/4/6$ ) as determined by flow cytometry. (c) Gating strategy for CD19<sup>+</sup> B cells and CD19<sup>-</sup> IA-IE<sup>hi</sup> antigen presenting cells (APC) that are composed of 75% of conventional dendritic cells (right). (d) Left. FACS histogram plot showing PD-L1 expression on spleen CD19<sup>-</sup> IA-IE<sup>hi</sup> APC the same mice as in (a) gated as shown in (c). Right. PD-L1 expression quantification on spleen CD19<sup>-</sup> IA-IE<sup>hi</sup> APC from mice as in (a). ( $n = 6/6/4/5$ ) as determined by flow cytometry. (e, f) Absolute numbers of basophils (e) and TFH cells (f) per spleen from mice as in (a and Fig. 6a) ( $n = 9/9/4/5$ ). (a-f) Results are from at least three independent experiments and presented as individual values in bars representing the mean values  $\pm$  s.e.m. Statistical analyses were by two way ANOVA followed by Tukey's multiple comparisons tests. *P* values are shown above each bracket. NS: not significant. Source data are provided in the Source Data file.

## Supplementary Figure 9

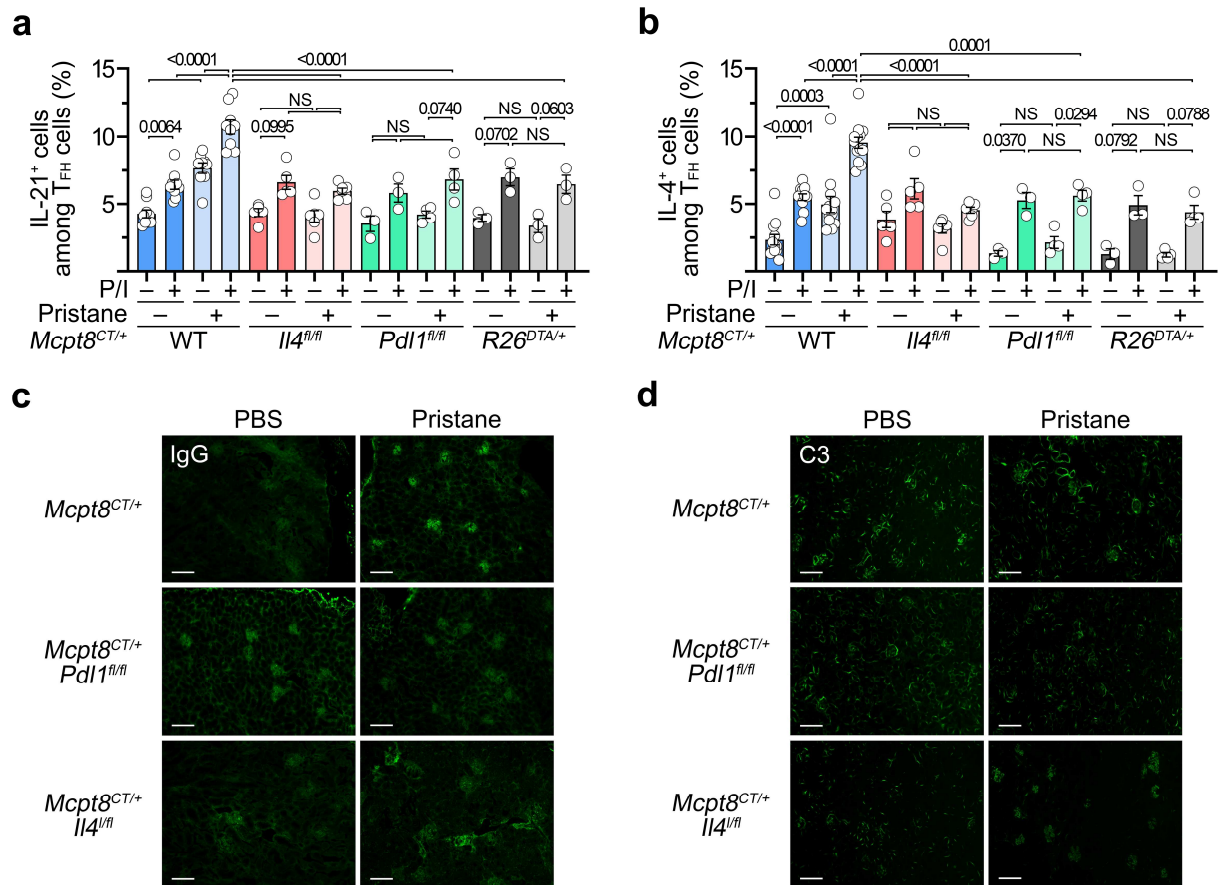

### Supplementary Fig. 9: IL-21 and IL-4 production by TFH cells, IgG and C3 deposits in kidneys of PBS- or pristane-injected animals

(a,b) Splenocytes from *Mcpt8<sup>CT/+</sup>* (WT, blue), *Mcpt8<sup>CT/+</sup> Il4<sup>fl/fl</sup>* (*Il4<sup>fl/fl</sup>*, red), *Mcpt8<sup>CT/+</sup> Pd1<sup>fl/fl</sup>* (*Pd1<sup>fl/fl</sup>*, green) and basophil-deficient (*Mcpt8<sup>CT/+</sup> R26<sup>DTA/+</sup>*) (*R26<sup>DTA/+</sup>*, grey) PBS-treated (Pristane –, darker colors) or pristane-treated (Pristane +, lighter colors) mice were stimulated with PMA and Ionomycin (P/I) (+) or not (–) as described in the methods section. Intracellular flow cytometry was realized to visualize the indicated cytokine productions on the indicated cellular compartments. (a,b) Proportions (%) of IL-21 (a) and IL-4 (b) producing cells among TFH cells in splenocytes (n= 9/9/5/6/3/4/3/3). Results are presented as individual values in bars representing the mean values  $\pm$  s.e.m. Statistical analyses were done by one way ANOVA followed by Tukey's multiple comparisons tests. *P* values are shown above each bracket. NS: not significant. (c,d) Representative pictures of one field of kidney from mice with the indicated genotypes treated without (PBS) or with pristane for 8 weeks showing the intensity of anti-IgG (c) or anti-C3 (d) staining by immunofluorescence. Scale bar = 200  $\mu$ m. Related to **Figures 6** and **7**. Source data are provided in the Source Data file.

## Supplementary Figure 10

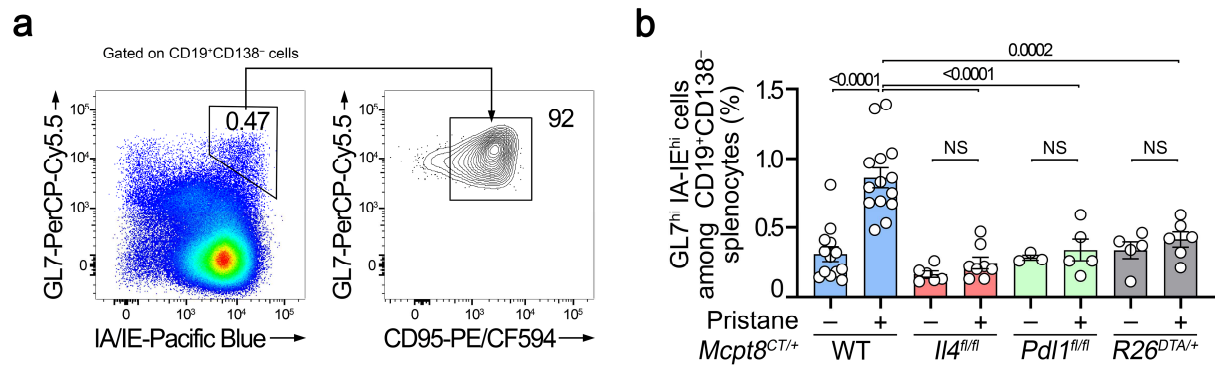

**Supplementary Fig. 10: Germinal center (GC) B cell induction in pristane-treated mice**

(a) Gating strategy for spleen CD19<sup>+</sup> CD138<sup>-</sup> GL7<sup>hi</sup> IA-IE<sup>hi</sup> B cells showing 92% identity with GC B cells gated with a conventional approach (CD19<sup>+</sup> CD138<sup>-</sup> GL7<sup>hi</sup> CD95<sup>+</sup>). (b) Proportions (%) of GL7<sup>hi</sup> IA-IE<sup>hi</sup> cells among CD19<sup>+</sup> CD138<sup>-</sup> B cells in splenocytes from *Mcpt8*<sup>CT/+</sup> (WT, blue), *Mcpt8*<sup>CT/+</sup>*Il4*<sup>fl/fl</sup> (*Il4*<sup>fl/fl</sup>, red), *Mcpt8*<sup>CT/+</sup>*Pd1*<sup>fl/fl</sup> (*Pd1*<sup>fl/fl</sup>, green) and basophil-deficient (*Mcpt8*<sup>CT/+</sup>*R26*<sup>DTA/+</sup>) (*R26*<sup>DTA/+</sup>, grey) PBS-treated (Pristane -) or pristane-treated (Pristane +) mice (n= 13/14/6/8/3/5/5/6). Results are presented as individual values in bars representing the mean values ± s.e.m. Statistical analyses were by two way ANOVA followed by Tukey's multiple comparisons tests between the indicated groups. *P* values are shown above each bracket. NS: not significant. Source data are provided in the Source Data file.

Supplementary Figure 11

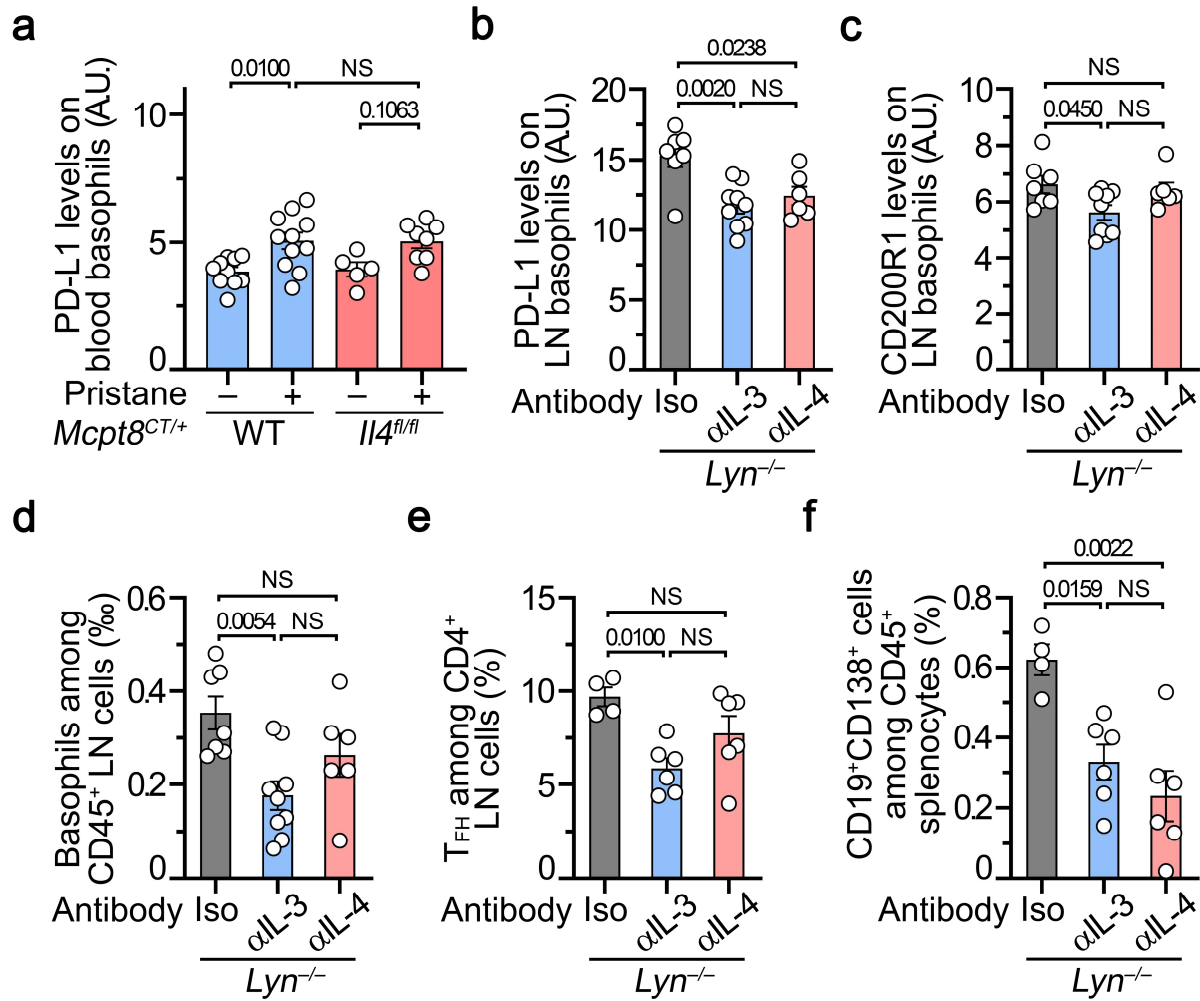

**Supplementary Fig. 11: IL-4 and IL-3 control PD-L1 expression, activation and localization of basophils in the lupus-like context**

(a) PD-L1 expression levels on blood basophils from *Mcpt8*<sup>CT/+</sup> (WT) (blue) or *Mcpt8*<sup>CT/+</sup> *Il4*<sup>fl/fl</sup> (*Il4*<sup>fl/fl</sup>) (red) mice injected with PBS (-) or with pristane (+) (n= 10/11/5/8). (b,c) PD-L1 (b) and CD200R1 (c) expression levels on basophils from lymph nodes (LN) of aged *Lyn*<sup>-/-</sup> mice as described in Fig. 7c (n= 7/9/6). (d,e,f) Proportions (%) of basophils among CD45<sup>+</sup> LN cells (d) (n= 7/9/6), proportions (%) of T<sub>FH</sub> cells among LN CD4<sup>+</sup> T cells (e) (n= 4/6/6) and CD19<sup>+</sup>CD138<sup>+</sup> cells among CD45<sup>+</sup> splenocytes (f) (n= 4/6/6) from aged *Lyn*<sup>-/-</sup> mice as described in Fig. 8c. (a-f) Results are from at least two independent experiments and presented as individual values in bars representing the mean values  $\pm$  s.e.m.. (a) Statistical analyses were by two-way ANOVA test followed by Tukey's multiple comparisons tests between the indicated groups. (b-f) Statistical analyses were by one-way ANOVA test followed by Tukey's multiple comparisons tests between the indicated groups. P values are shown above each bracket. NS: not significant. Source data are provided in the Source Data file.

**Supplementary Figure 12**

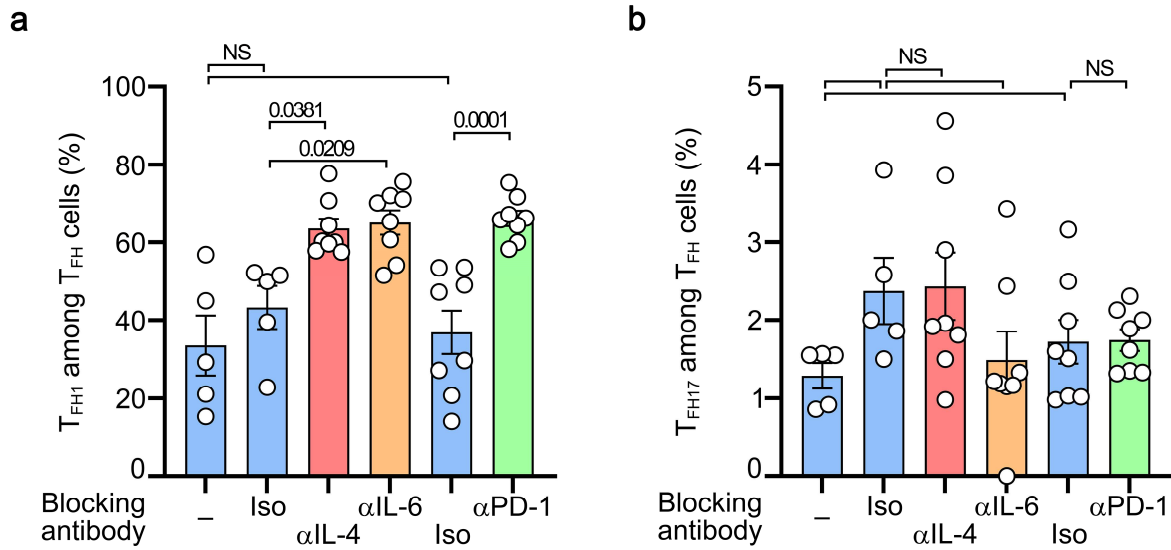

**Supplementary Fig. 12: Human basophils drive TFH2 cell differentiation through IL-4, IL-6, and PD-L1 dependent mechanisms *ex vivo***

(a,b) Proportions (%) of TFH1 (a) and TFH17 (b) cells among TFH cells after culture as described in (Fig. 9d). TFH1 cells were defined as CD4<sup>+</sup> PD1<sup>+</sup> CXCR5<sup>+</sup> ICOS<sup>+</sup> CCR6<sup>-</sup> CXCR3<sup>+</sup> cells and TFH17 cells as CD4<sup>+</sup> PD1<sup>+</sup> CXCR5<sup>+</sup> ICOS<sup>+</sup> CCR6<sup>+</sup> CXCR3<sup>-</sup> cells (n= 5/5/8/8/8/8). (a,b) Data are presented as individual values in bars representing the mean values  $\pm$  s.e.m. Results are from three independent experiments. Statistical analyses were done by one-way ANOVA test followed by Tukey's multiple comparisons tests between the indicated groups. *P* values are shown above each bracket. NS: not significant. Source data are provided in the Source Data file.



**Supplementary Figure 13**

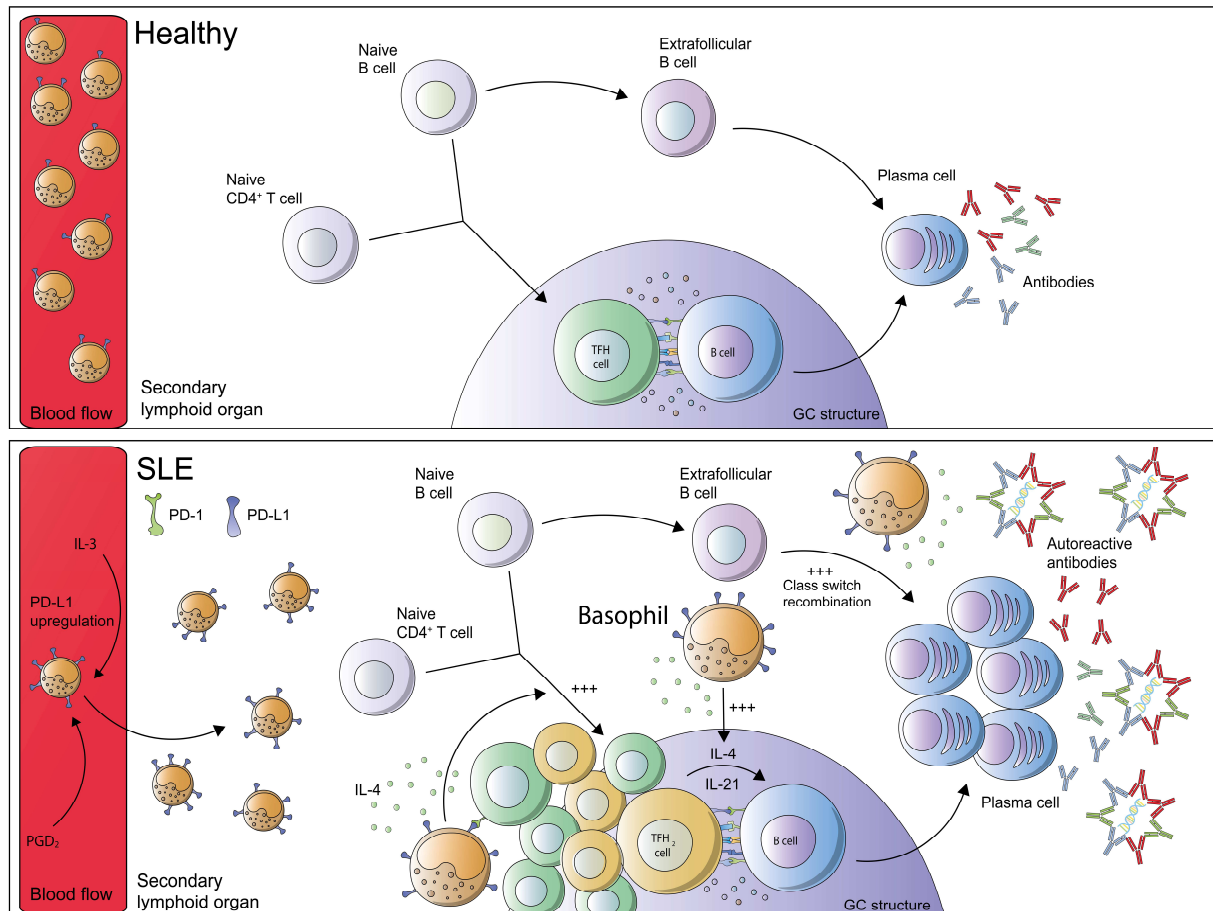

**Supplementary Fig. 13: PD-L1- and IL-4-expressing basophils promote pathogenic accumulation of T follicular helper cells in lupus.**

In a healthy context (top), unstimulated basophils do not leave the blood stream. In this condition, basophils do not contribute to follicular and extrafollicular responses to a given antigen in secondary lymphoid organs (SLO). In the SLE context (bottom), IL-3 upregulates PD-L1 expression by basophils and prostaglandin D<sub>2</sub> (PGD<sub>2</sub>) (through CXCR4 externalization induction) enables basophil accumulation in SLO. There, in a PD-L1- and IL-4-dependent manner, basophils promote CD4<sup>+</sup> T cell differentiation into TFH cells mainly of the TFH2 cell subset, germinal center (GC) formation, plasma cell accumulation and autoantibody production. Basophils influence also the maturation of extrafollicular B cells in a PD-L1 dependent way and class switch recombination in an IL-4 dependent manner.



**Supplementary Table 1. SLE Patient and healthy control characteristics**

| Variables                                   | SLE patients |                     |                   |                   | Healthy controls |
|---------------------------------------------|--------------|---------------------|-------------------|-------------------|------------------|
|                                             | ALL SLE      | Inactive (SLEDAI≤1) | Mild (1<SLEDAI≤4) | Active (SLEDAI>4) |                  |
| <b>Demographic characteristics</b>          |              |                     |                   |                   |                  |
| n                                           | 204          | 54                  | 51                | 99                | 43               |
| Age, mean±SD, yr                            | 38.87±12.4   | 44.43±13.5          | 39.4±11.9         | 35.6±10.9         | 34±9.2           |
| Female, n (%)                               | 184 (90)     | 47 (87)             | 47 (92)           | 90 (90)           | 32 (74)          |
| <b>Lupus characteristics</b>                |              |                     |                   |                   |                  |
| Disease duration, mean±SD, yr               | 9.5±8.5      | 14.2±9.0            | 10.4±7.3          | 7.00±7.8          | -                |
| Anti-dsDNA Ab positive, n (%)               | 111 (54)     | 7 (12)              | 26 (51)           | 78 (79)           | -                |
| History of lupus nephritis, n (%)           | 163 (80)     | 32 (59)             | 37 (73)           | 89 (90)           | -                |
| SLEDAI                                      |              |                     |                   |                   |                  |
| Mean±SD                                     | 6.2±6.3      | 0.0±0.2             | 3.2±0.9           | 11.2±5.5          | -                |
| Median (Min-Max)                            | 4 (0-33)     | 0 (0-1)             | 4 (2-4)           | 10 (5-33)         | -                |
| <b>Treatment characteristics</b>            |              |                     |                   |                   |                  |
| Current prednisone dose (mg/day)            |              |                     |                   |                   |                  |
| Mean±SD                                     | 13.5±38.8    | 3.7±3.8             | 7.8±7.9           | 22.2±54.8         | -                |
| 15mg/day or higher, n (%)                   | 39 (19)      | 1 (2)               | 8 (16)            | 30 (30)           | -                |
| Concurrent immunosuppressive therapy (n, %) |              |                     |                   |                   |                  |
| hydroxychloroquine                          | 174 (85)     | 43 (80)             | 46 (90)           | 82 (83)           | -                |
| mycophenolate mofetil                       | 67 (33)      | 18 (33)             | 22 (43)           | 27 (27)           | -                |
| IV cyclophosphamide                         | 13 (6)       | 1 (2)               | 1 (2)             | 11 (11)           | -                |
| azathioprine                                | 16 (8)       | 0 (0)               | 5 (10)            | 11 (11)           | -                |

SD: standard deviation; yr: year; IV: intravenous.

**Supplementary Table 2.**

| Surface Marker | Healthy control basophils |        |    | SLE patient basophils |        |     | p-value |
|----------------|---------------------------|--------|----|-----------------------|--------|-----|---------|
|                | Mean                      | SD     | n  | Mean                  | SD     | n   |         |
| PD-L1          | 5.603                     | 2.028  | 39 | 8.455                 | 4.308  | 204 | <0.0001 |
| PD-L2          | 0.9547                    | 0.1361 | 5  | 1.085                 | 0.2912 | 42  | 0.2737  |
| ICOSL          | 1.676                     | 0.2078 | 5  | 1.757                 | 0.5207 | 56  | 0.9492  |
| OX40L          | 2.499                     | 1.842  | 18 | 2.647                 | 1.92   | 178 | 0.8469  |
| CD84           | 21.41                     | 4.981  | 20 | 26.09                 | 11.2   | 74  | 0.0956  |

**Supplementary Table 2: Expression levels of some T cell interacting surface molecules on basophils from healthy controls and SLE patients**

Expression levels on basophils of the indicated surface markers were determined by flow cytometry as described in supplementary Fig. S1 and in the Methods section. “Mean” corresponds to the mean of the ratio of the geometric mean fluorescence intensity (gMFI) of the indicated surface marker and the gMFI of the isotype control as determined by flow cytometry for each group. SD: standard deviation. Statistical analyses were done by two-sided Mann-Whitney U tests between the two groups.

**Supplementary Table 3 : Resource Table**

| REAGENT or RESOURCE                                                    | SOURCE                   | IDENTIFIER                          | Concentration used<br>(for FACS staining:<br>200 µL for 2x10 <sup>6</sup> cells) |
|------------------------------------------------------------------------|--------------------------|-------------------------------------|----------------------------------------------------------------------------------|
| <b>Antibodies</b>                                                      |                          |                                     |                                                                                  |
| Alexa Fluor 488 anti-mouse Complement Component C3 (Clone: 11H9)       | Santa Cruz Biotechnology | (Cat# sc-58926, RRID:AB_1119819)    | 2 µg/mL                                                                          |
| Alexa Fluor 488 anti-mouse/human CD44 (Clone: IM7)                     | Biologend                | (Cat# 103016, RRID:AB_493679)       | 1 µg/mL                                                                          |
| Alexa Fluor 488 anti-mouse IgG Fcγ fragment specific (Goat Polyclonal) | Jackson ImmunoResearch   | (Cat# 115-545-008, RRID:AB_2338842) | 20 µg/mL                                                                         |
| Alexa Fluor 488 anti-mouse/human CD45R/B220 Antibody (Clone: RA3-6B2)  | Biologend                | (Cat# 103225, RRID:AB_389308)       | 10 µg/mL                                                                         |
| Alexa Fluor 488 anti-mouse CD25 (Clone: PC61)                          | Biologend                | (Cat# 102017, RRID:AB_493333)       | 2.5 µg/mL                                                                        |
| Alexa Fluor 488 anti-mouse IgD Antibody (Clone: 11-26c.2a)             | Biologend                | (Cat# 405718, RRID:AB_10730619)     | 2.5 µg/mL                                                                        |
| Alexa Fluor 647 anti-mouse FcεR1α (Clone: MAR-1)                       | Biologend                | (Cat# 134310, RRID:AB_1626093)      | 2.5 µg/mL                                                                        |
| Alexa Fluor 647 anti-mouse CD3ε (Clone: 145-2C11)                      | Biologend                | (Cat# 100322, RRID:AB_389322)       | 2.5 µg/mL                                                                        |
| Alexa Fluor 647 anti-mouse IgG (Clone: Poly4053)                       | Biologend                | (Cat# 405322, RRID:AB_2563045)      | 2.5 µg/mL                                                                        |
| Alexa Fluor 647 anti-mouse/human GL7 Antigen Antibody (Clone: GL7)     | Biologend                | (Cat# 144606, RRID:AB_2562185)      | 10 µg/mL                                                                         |
| Alexa Fluor 700 anti-mouse CD45 (Clone: 30-F11)                        | Biologend                | (Cat# 103128, RRID:AB_493715)       | 1 µg/mL                                                                          |
| Alexa Fluor 700 anti-mouse CD62L (Clone: MEL-14)                       | Biologend                | (Cat# 104426, RRID:AB_493719)       | 2.5 µg/mL                                                                        |
| Alexa Fluor 700 anti-mouse Ly-6G/Ly-6C Antibody (Clone: Gr-1)          | Biologend                | (Cat# 108422, RRID:AB_2137487)      | 0.5 µg/mL                                                                        |
| Alexa Fluor 700 anti-mouse I-A/I-E Antibody (Clone: M5/114.15.2)       | Biologend                | (Cat# 107622, RRID:AB_493727)       | 1 µg/mL                                                                          |
| APC anti-mouse IL-3 Antibody (Clone: MP2-8F8)                          | Biologend                | (Cat# 503908, RRID:AB_2810628)      | 2 µg/mL                                                                          |
| APC/Fire 750 anti-mouse CD4 (Clone: RM4-5)                             | Biologend                | (Cat# 100568, RRID:AB_2629699)      | 1 µg/mL                                                                          |
| APC/Cyanine7 anti-mouse CD4 (Clone: RM4-5)                             | Biologend                | (Cat# 100526, RRID:AB_312727)       | 1 µg/mL                                                                          |
| APC/Cyanine7 anti-mouse TCR β chain (Clone: H57-597)                   | Biologend                | (Cat# 109220, RRID:AB_893624)       | 1 µg/mL                                                                          |
| APC/Fire 750 anti-mouse TCR β chain (Clone: H57-597)                   | Biologend                | (Cat# 109246, RRID:AB_2629697)      | 1 µg/mL                                                                          |
| APC/Cyanine7 anti-mouse CD19 (Clone: 6D5)                              | Biologend                | (Cat# 115530, RRID:AB_830707)       | 1 µg/mL                                                                          |
| APC/Fire 750 anti-mouse CD19 (Clone: 6D5)                              | Biologend                | (Cat# 115558, RRID:AB_2572120)      | 1 µg/mL                                                                          |
| APC/Cyanine7 anti-mouse CD117 (c-kit) (Clone: 2B8)                     | Biologend                | (Cat# 105826, RRID:AB_1626278)      | 1 µg/mL                                                                          |

|                                                                       |                          |                                    |               |
|-----------------------------------------------------------------------|--------------------------|------------------------------------|---------------|
| APC/Fire 750 anti-mouse CD117 (c-Kit) (Clone: 2B8)                    | Biolegend                | (Cat# 105838, RRID:AB_2616739)     | 1 µg/mL       |
| APC/Fire 750 anti-mouse CD11c Antibody (Clone: N418)                  | Biolegend                | (Cat# 117352, RRID:AB_2572124)     | 1 µg/mL       |
| Biotin anti-mouse CD185 (CXCR5) (Clone: L138D7)                       | Biolegend                | (Cat# 145510, RRID:AB_2562126)     | 5 µg/mL       |
| Biotin anti-mouse CD4 (Clone: RM4-5)                                  | Biolegend                | (Cat# 100508, RRID:AB_312711)      | 5 µg/mL       |
| Biotin anti-mouse CD19 (Clone: 6D5)                                   | Biolegend                | (Cat# 115504, RRID:AB_313639)      | 5 µg/mL       |
| Biotin anti-mouse CD8a (Clone: 53-6.7)                                | Biolegend                | (Cat# 100704, RRID:AB_312743)      | 5 µg/mL       |
| Biotin anti-mouse NK-1.1 (Clone: PK136)                               | Biolegend                | (Cat# 108704, RRID:AB_313391)      | 5 µg/mL       |
| BUV395 anti-mouse CD45 (Clone: 30-F11)                                | BD Biosciences           | (Cat# 564279, RRID:AB_2651134)     | 0.5 µg/mL     |
| Brilliant Violet 421 anti-mouse CD4 (Clone: GK1.5)                    | Biolegend                | (Cat# 100438, RRID:AB_11203718)    | 0.12 µg/mL    |
| Brilliant Violet 421 anti-mouse CD4 (Clone : RM4-5)                   | Biolegend                | (Cat# 100563, RRID:AB_2563052)     | 10 µg/mL (IF) |
| Brilliant Violet 421 anti-mouse CD279 (PD-1) (Clone: 29F.1A12)        | Biolegend                | (Cat# 135218, RRID:AB_2561447)     | 0.12 µg/mL    |
| Brilliant Violet 421 anti-mouse CD138 (Syndecan-1) (Clone: 281-2)     | Biolegend                | (Cat# 142508, RRID:AB_11203544)    | 0.25 µg/mL    |
| Brilliant Violet 421 anti-mouse/human CD44 (Clone: IM7)               | Biolegend                | (Cat# 103040, RRID:AB_2616903)     | 0.25 µg/mL    |
| Brilliant Violet 605 anti-mouse CD45 (Clone: 30-F11)                  | Biolegend                | (Cat# 103140, RRID:AB_2562342)     | 0.2 µg/mL     |
| Brilliant Violet 605 anti-mouse CD279 (PD-1) (Clone: 29F.1A12)        | Biolegend                | (Cat# 135220, RRID:AB_2562616)     | 1 µg/mL       |
| Brilliant Violet 605 anti-mouse CD152 (Clone: UC10-4B9)               | Biolegend                | (Cat# 106323, RRID:AB_2566467)     | 1 µg/mL       |
| Brilliant Violet 785 anti-mouse CD19 (Clone: 6D5)                     | Biolegend                | (Cat# 115543, RRID:AB_11218994)    | 0.15 µg/mL    |
| Brilliant Violet 785 anti-mouse/human CD44 (Clone: IM7)               | Biolegend                | (Cat# 103059, RRID:AB_2571953)     | 0.5 µg/mL     |
| Brilliant Violet 785 anti-mouse CD274 (B7-H1, PD-L1) (Clone: 10F.9G2) | Biolegend                | (Cat# 124331, RRID:AB_2629659)     | 1 µg/mL       |
| eFluor 450 anti-mouse IL-6 (Clone: MP5-20F3)                          | Thermo Fisher Scientific | (Cat# 48-7061-82, RRID:AB_2574103) | 2 µg/mL       |
| eFluor 450 anti-mouse IL-21 (Clone: FFA21)                            | Thermo Fisher Scientific | (Cat# 48-7211-82, RRID:AB_2811832) | 2 µg/mL       |
| FITC anti-mouse Complement Component C3 (Clone: RmC11H9)              | Cedarlane                | (Cat# CL7503F, RRID:AB_10061294)   | 10 µg/mL      |
| FITC anti-mouse IgM (Goat polyclonal)                                 | BioRad (AbD Serotec)     | (Cat# 102002, RRID:AB_619870)      | 2.5 µg/mL     |
| FITC anti-mouse CD123 (Clone: 5B11)                                   | Thermo Fisher Scientific | (Cat# 11-1231-82, RRID:AB_465192)  | 2.5 µg/mL     |
| FITC anti-mouse CD49b (Clone: HMα2)                                   | Biolegend                | (Cat# 103504, RRID:AB_313027)      | 2.5 µg/mL     |
| FITC anti-mouse IL-6 (Clone: MP5-20F3)                                | Thermo Fisher Scientific | (Cat# 11-7061-82, RRID:AB_465394)  | 2.5 µg/mL     |

|                                                                  |                          |                                    |                    |
|------------------------------------------------------------------|--------------------------|------------------------------------|--------------------|
| FITC anti-mouse TNF- $\alpha$ (Clone: MP6-XT22)                  | R&D Systems              | (Cat# IC410F, RRID:AB_357323)      | 2.5 $\mu$ g/mL     |
| FITC anti-mouse IgA (Polyclonal IgG)                             | BioRad (AbD Serotec)     | (Cat# STAR137, RRID:AB_2075638)    | 2.5 $\mu$ g/mL     |
| FITC anti-mouse IgE (Clone: RME-1)                               | Biologend                | (Cat# 406906, RRID:AB_493289)      | 10 $\mu$ g/mL (IF) |
| Pacific Blue anti-mouse CD49b (pan-NK cells) (Clone: DX5)        | Biologend                | (Cat# 108918, RRID:AB_2265144)     | 2.5 $\mu$ g/mL     |
| Pacific Blue anti-mouse I-A/I-E Antibody (Clone: M5/114.15.2)    | Biologend                | (Cat# 107620, RRID:AB_493527)      | 2.5 $\mu$ g/mL     |
| PE anti-mouse IL-21 (Clone: FFA21)                               | Thermo Fisher Scientific | (Cat# 12-7211-82, RRID:AB_1834466) | 2 $\mu$ g/mL       |
| PE anti-mouse CD278 (ICOS) (Clone: 15F9)                         | Biologend                | (Cat# 107706, RRID:AB_313335)      | 2 $\mu$ g/mL       |
| PE anti-mouse FOXP3 (Clone: FJK-16s)                             | Thermo Fisher Scientific | (Cat# 12-5773-82, RRID:AB_465936)  | 4 $\mu$ g/mL       |
| PE anti-mouse CD200R3 (Clone: Ba13)                              | Biologend                | (Cat# 142206, RRID:AB_10916520)    | 0.5 $\mu$ g/mL     |
| PE-CF594 anti-mouse IL-4 (Clone: 11B11)                          | BD Biosciences           | (Cat# 562450, RRID:AB_2737616)     | 2 $\mu$ g/mL       |
| PE-CF594 Hamster Anti-Mouse CD95 (Clone: Jo2)                    | BD Biosciences           | (Cat# 562499, RRID:AB_11154214)    | 0.5 $\mu$ g/mL     |
| PE/Cyanine7 anti-mouse CD200R3 (Clone: Ba13)                     | Biologend                | (Cat# 142212, RRID:AB_2814046)     | 0.5 $\mu$ g/mL     |
| PE/Cyanine7 anti-mouse CD317 (BST2, PDCA-1) (Clone: eBio927)     | Thermo Fisher Scientific | (Cat# 25-3172-82, RRID:AB_2573440) | 1 $\mu$ g/mL       |
| PE/Cyanine7 anti-human/mouse Bcl-6 Antibody (Clone: 7D1)         | Biologend                | (Cat# 358512, RRID:AB_2566196)     | 5 $\mu$ g/mL       |
| PE/Cyanine7 anti-mouse CD45 (Clone: 30-F11)                      | Biologend                | (Cat# 103114, RRID:AB_312979)      | 0.4 $\mu$ g/mL     |
| PE/Cyanine7 anti-mouse IL-13 (Clone: eBio13A)                    | Thermo Fisher Scientific | (Cat# 25-7133-82, RRID:AB_2573530) | 2 $\mu$ g/mL       |
| PE/Cyanine7 anti-mouse CD62L (Clone: MEL-14)                     | Biologend                | (Cat# 104418, RRID:AB_313103)      | 1 $\mu$ g/mL       |
| PE/Cyanine7 anti-mouse CD274 (B7-H1, PD-L1) (Clone: 10F.9G2)     | Biologend                | (Cat# 124314, RRID:AB_10643573)    | 1 $\mu$ g/mL       |
| PE/Cyanine7 anti-mouse CD90.2 (Thy-1.2) Antibody (Clone: 53-2.1) | Biologend                | (Cat# 140310, RRID:AB_10643586)    | 1 $\mu$ g/mL       |
| PE/Dazzle 594 anti-mouse CD279 (PD-1) (Clone: 29F.1A12)          | Biologend                | (Cat# 135228, RRID:AB_2566006)     | 1 $\mu$ g/mL       |
| PE/Dazzle 594 anti-mouse CD19 (Clone: 6D5)                       | Biologend                | (Cat# 115554, RRID:AB_2564001)     | 1 $\mu$ g/mL       |
| PE/Dazzle 594 anti-mouse/human CD44 (Clone: IM7)                 | Biologend                | (Cat#103056, RRID:AB_2564044)      | 0.4 $\mu$ g/mL     |
| PE/Dazzle 594 anti-mouse/human CD11b Antibody (Clone: M1/70)     | Biologend                | (Cat#101256, RRID:AB_2563648)      | 0.5 $\mu$ g/mL     |
| PerCP/Cyanine5.5 anti-mouse CD8a (Clone: 53-6.7)                 | Biologend                | (Cat# 100734, RRID:AB_2075238)     | 1 $\mu$ g/mL       |
| PerCP/Cyanine5.5 anti-mouse CD4 (Clone: RM4-5)                   | Biologend                | (Cat# 100540, RRID:AB_893326)      | 1 $\mu$ g/mL       |
| PerCP/Cyanine5.5 anti-mouse IFN- $\gamma$ (Clone: XMG1.2)        | Biologend                | (Cat# 505822, RRID:AB_961359)      | 1 $\mu$ g/mL       |

|                                                                       |                          |                                     |            |
|-----------------------------------------------------------------------|--------------------------|-------------------------------------|------------|
| PerCP/Cyanine5.5 anti-mouse/human GL7 Antigen Antibody (Clone: GL7)   | Biolegend                | (Cat# 144610, RRID:AB_2562979)      | 1 µg/mL    |
| PerCP/eFluor710 anti-mouse IgM (Clone: II/41)                         | Thermo Fisher Scientific | (Cat#46-5790-82, RRID:AB_1834435)   | 1 µg/mL    |
| PerCP/eFluor710 anti-mouse CD200R (Clone: OX110)                      | Thermo Fisher Scientific | (Cat#46-5201-82, RRID: AB_10804765) | 1 µg/mL    |
| Alexa Fluor 647 anti-human CD294 (CRTH2) (Clone: BM16)                | Biolegend                | (Cat# 350104, RRID:AB_10642025)     | 1 µg/mL    |
| Alexa Fluor 647 anti-human CD273 (B7-DC, PD-L2) (Clone: MIH18)        | Biolegend                | (Cat# 345514, RRID:AB_2728313)      | 0.5 µg/mL  |
| Alexa Fluor 700 anti-human/mouse/rat CD278 (ICOS) (Clone: C398.4A)    | Biolegend                | (Cat# 313528, RRID:AB_2566126)      | 5 µg/mL    |
| APC anti-human CD4 (Clone: RPA-T4)                                    | Biolegend                | (Cat# 300537, RRID:AB_2562051)      | 1 µg/mL    |
| APC anti-human CD275 (B7-H2, ICOSL) (Clone: 2D3)                      | Biolegend                | (Cat# 309408, RRID:AB_2565557)      | 1 µg/mL    |
| APC/Cyanine7 anti-human CD183 (CXCR3) (Clone: G025H7)                 | Biolegend                | (Cat# 353722, RRID:AB_2561423)      | 1 µg/mL    |
| Brilliant Violet 421 anti-human CD203c (E-NPP3) (Clone: NP4D6)        | Biolegend                | (Cat# 324612, RRID:AB_2563848)      | 0.12 µg/mL |
| Brilliant Violet 421 anti-human CD274 (B7-H1, PD-L1) (Clone: 29E.2A3) | Biolegend                | (Cat# 329714, RRID:AB_2563852)      | 0.25 µg/mL |
| Brilliant Violet 421 anti-human CD279 (PD-1) (Clone: NAT105)          | Biolegend                | (Cat# 367422, RRID:AB_2721517)      | 0.25 µg/mL |
| Brilliant Violet 605 anti-human CD193 (CCR3) (Clone: 5E8)             | Biolegend                | (Cat# 310716, RRID:AB_2563831)      | 0.5 µg/mL  |
| Brilliant Violet 785 anti-human CD196 (CCR6) (Clone: G034E3)          | Biolegend                | (Cat# 353422, RRID:AB_2563660)      | 0.8 µg/mL  |
| BUV395 anti-human CD3 (Clone: SK7 (also known as Leu-4))              | BD Biosciences           | (Cat# 564000, RRID:AB_2744382)      | 0.5 µg/mL  |
| BUV395 anti-human CD14 (Clone: MφP9 (also known as MφP-9))            | BD Biosciences           | (Cat# 563561, RRID:AB_2744288)      | 1 µg/mL    |
| BUV395 anti-human CD56 (Clone: NCAM16.2 (also known as NCAM 16))      | BD Biosciences           | (Cat# 563554, RRID:AB_2687886)      | 1 µg/mL    |
| BUV395 anti-human CD19 (Clone: SJ25C1 (also known as SJ25-C1))        | BD Biosciences           | (Cat# 563551, RRID:AB_2738274)      | 0.5 µg/mL  |
| PE anti-human CD185 (CXCR5) (Clone: J252D4)                           | Biolegend                | (Cat# 356904, RRID:AB_2561813)      | 0.5 µg/mL  |
| PE anti-human CD84 (Clone: CD84.1.21)                                 | Biolegend                | (Cat# 326008, RRID:AB_2229003)      | 1 µg/mL    |
| PE anti-human CD252 (OX40L) (Clone: 11C3.1)                           | Biolegend                | (Cat# 326308, RRID:AB_2207271)      | 4 µg/mL    |
| PE/Cyanine7 anti-human FcεRIα (Clone: AER-37 (CRA-1))                 | Biolegend                | (Cat# 334620, RRID:AB_10575314)     | 0.5 µg/mL  |
| PE/Dazzle 594 anti-human CD123 (Clone: 6H6)                           | Biolegend                | (Cat# 306034, RRID:AB_2566450)      | 0.06 µg/mL |
| PerCP/Cyanine5.5 anti-human CD184 (CXCR4) Antibody (Clone: 12G5)      | Biolegend                | (Cat# 306516, RRID:AB_10642818)     | 2 µg/mL    |

|                                                                      |                        |                                     |            |
|----------------------------------------------------------------------|------------------------|-------------------------------------|------------|
| Alexa Fluor 488 Rat IgG2a, κ Isotype Control (Clone: RTK2758)        | Biologend              | (Cat# 400525, RRID:AB_2864283)      | 2 µg/mL    |
| Alexa Fluor 488 Goat IgG whole molecule (Goat polyclonal)            | Jackson ImmunoResearch | (Cat# 005-540-003, RRID:AB_2337013) | 20 µg/mL   |
| Alexa Fluor 488 Rat IgG2b, κ Isotype Control (Clone: RTK4530)        | Biologend              | (Cat# 400625, RRID:AB_389321)       | 1 µg/mL    |
| Alexa Fluor 647 Armenian Hamster IgG Isotype Control (Clone: HTK888) | Biologend              | (Cat# 400924, RRID:AB_2922967)      | 2.5 µg/mL  |
| Alexa Fluor 647 Rat IgG2a, κ Isotype Control (Clone: RTK2758)        | Biologend              | (Cat# 400526, RRID:AB_2864284)      | 1 µg/mL    |
| Alexa Fluor 647 Mouse IgG1, κ Isotype Control (Clone: MOPC-21)       | Biologend              | (Cat# 400130, RRID:AB_2800436)      | 1 µg/mL    |
| Alexa Fluor 647 Rat IgM, κ Isotype Control (Clone: RTK2118)          | Biologend              | (Cat# 400813, RRID:AB_2086804)      | 10 µg/mL   |
| Alexa Fluor 700 Rat IgG2a, κ Isotype Control (Clone: RTK2758)        | Biologend              | (Cat# 400528, RRID:AB_2923249)      | 2.5 µg/mL  |
| Alexa Fluor 700 Rat IgG2b, κ Isotype Control (Clone: RTK4530)        | Biologend              | (Cat# 400628, RRID:AB_493783)       | 1 µg/mL    |
| Alexa Fluor 700 Mouse IgG1, κ Isotype Control (Clone: MOPC-21)       | Biologend              | (Cat# 400143, RRID:AB_2923250)      | 1 µg/mL    |
| APC Mouse IgG1, κ Isotype Control (Clone: MOPC-21)                   | Biologend              | (Cat# 400119, RRID:AB_2888687)      | 1 µg/mL    |
| APC Mouse IgG2b, κ Isotype Control (Clone: MPC-11)                   | Biologend              | (Cat# 400322, RRID:AB_326500)       | 1 µg/mL    |
| APC Rat IgG1, κ Isotype Ctrl Antibody (Clone: RTK2071)               | Biologend              | (Cat# 400412, RRID:AB_326518)       | 2 µg/mL    |
| APC/Cyanine7 Armenian Hamster IgG Isotype Control (Clone: HTK888)    | Biologend              | (Cat# 400927, RRID:AB_2923251)      | 1 µg/mL    |
| APC/Cyanine7 Rat IgG2a, κ Isotype Control (Clone: RTK2758)           | Biologend              | (Cat# 400523, RRID:AB_2923252)      | 1 µg/mL    |
| APC/Cyanine7 Rat IgG2b, κ Isotype Control (Clone: RTK4530)           | Biologend              | (Cat# 400623, RRID:AB_326565)       | 1 µg/mL    |
| APC/Cyanine7 Mouse IgG1, κ Isotype Control (Clone: MOPC-21)          | Biologend              | (Cat# 400127, RRID:AB_2892538)      | 1 µg/mL    |
| APC/Fire 750 Armenian Hamster IgG Isotype Control (Clone: HTK888)    | Biologend              | (Cat# 400961, RRID:AB_2923253)      | 1 µg/mL    |
| APC/Fire 750 Rat IgG2a, κ Isotype Control (Clone: RTK2758)           | Biologend              | (Cat# 400567, RRID:AB_2923254)      | 1 µg/mL    |
| APC/Fire 750 Rat IgG2b, κ Isotype Control (Clone: RTK4530)           | Biologend              | (Cat# 400669, RRID:AB_2905475)      | 1 µg/mL    |
| Biotin Rat IgG2b, κ Isotype Control (Clone: RTK4530)                 | Biologend              | (Cat# 400603, RRID:AB_326547)       | 5 µg/mL    |
| BUV395 Rat IgG2b, κ Isotype Control (Clone: R35-38)                  | BD Biosciences         | (Cat# 563560, RRID:AB_2869507)      | 0.5 µg/mL  |
| BUV395 Mouse IgG1, κ Isotype Control (Clone: X-40)                   | BD Biosciences         | (Cat# 563547, RRID:AB_2869503)      | 1 µg/mL    |
| BUV395 Mouse IgG2b, κ Isotype Control (Clone: 27-35)                 | BD Biosciences         | (Cat# 563558, RRID:AB_2869505)      | 0.5 µg/mL  |
| Brilliant Violet 421 Rat IgG2a, κ Isotype Control (Clone: RTK2758)   | Biologend              | (Cat# 400535, RRID:AB_10933427)     | 0.12 µg/mL |

|                                                                           |                          |                                    |            |
|---------------------------------------------------------------------------|--------------------------|------------------------------------|------------|
| Brilliant Violet 421™ Rat IgG2b, κ Isotype Control (Clone: RTK4530)       | Biolegend                | (Cat# 400639, RRID:AB_10895758)    | 0.12 µg/mL |
| Brilliant Violet 421 Mouse IgG1, κ Isotype Control (Clone: MOPC-21)       | Biolegend                | (Cat# 400157, RRID:AB_10897939)    | 0.12 µg/mL |
| Brilliant Violet 421 Mouse IgG2b, κ Isotype Control (Clone: MPC-11)       | Biolegend                | (Cat# 400341, RRID:AB_10898160)    | 0.25 µg/mL |
| Brilliant Violet 605 Armenian Hamster IgG Isotype Control (Clone: HTK888) | Biolegend                | (Cat# 400943, RRID:AB_2923255)     | 1 µg/mL    |
| Brilliant Violet 605 Rat IgG2a, κ Isotype Control (Clone: RTK2758)        | Biolegend                | (Cat# 400539, RRID:AB_11126979)    | 1 µg/mL    |
| Brilliant Violet 605 Rat IgG2b, κ Isotype Control (Clone : RTK4530)       | Biolegend                | (Cat# 400649, RRID:AB_2864282)     | 0.2 µg/mL  |
| Brilliant Violet 785 Rat IgG2a, κ Isotype Control (Clone: RTK2758)        | Biolegend                | (Cat# 400545, RRID:AB_11218993)    | 1 µg/mL    |
| Brilliant Violet 785 Rat IgG2b, κ Isotype Control (Clone: RTK4530)        | Biolegend                | (Cat# 400647, RRID:AB_2923256)     | 1 µg/mL    |
| Brilliant Violet 785 Mouse IgG2a, κ Isotype Control (Clone: MOPC-173)     | Biolegend                | (Cat# 400273, RRID:AB_2923257)     | 0.8 µg/mL  |
| eFluor 450 Rat IgG1, κ Isotype Control (Clone: eBRG1)                     | Thermo Fisher Scientific | (Cat# 48-4301-82, RRID:AB_1271984) | 2 µg/mL    |
| eFluor 450 Rat IgG2a, κ Isotype Control (Clone: eBRG1)                    | Thermo Fisher Scientific | (Cat# 48-4321-82, RRID:AB_1271999) | 2 µg/mL    |
| FITC Armenian Hamster IgG Isotype Control (Clone: HTK888)                 | Biolegend                | (Cat# 400905, RRID:AB_2923258)     | 2.5 µg/mL  |
| FITC Rat IgG1, κ Isotype Control (Clone: RTK2071)                         | Biolegend                | (Cat# 400405, RRID:AB_326511)      | 2.5 µg/mL  |
| FITC Rat IgG2a, κ Isotype Control (Clone: RTK2758)                        | Biolegend                | (Cat# 400506, RRID:AB_2736919)     | 2.5 µg/mL  |
| Pacific Blue Rat IgM, κ Isotype Control (Clone: RTK2118)                  | Biolegend                | (Cat# 400816, RRID:AB_10644001)    | 2.5 µg/mL  |
| Pacific Blue Rat IgG2b, κ Isotype Ctrl Antibody (Clone: RTK4530)          | Biolegend                | (Cat# 400627, RRID:AB_493561)      | 2.5 µg/mL  |
| PE Mouse IgG1, κ Isotype Control (Clone: MOPC-21)                         | Biolegend                | (Cat# 400112, RRID:AB_2847829)     | 0.5 µg/mL  |
| PE Mouse IgG2a, κ Isotype Control Antibody (Clone: MOPC-173)              | Biolegend                | (Cat# 400212, RRID:AB_326460)      | 1 µg/mL    |
| PE Rat IgG2a, κ Isotype Control Antibody (Clone: RTK2758)                 | Biolegend                | (Cat# 400508, RRID:AB_326530)      | 0.5 µg/mL  |
| PE-CF594 Rat IgG1, κ Isotype Control (Clone: R3-34)                       | BD Biosciences           | (Cat# 562309, RRID:AB_11153318)    | 2 µg/mL    |
| PE-CF594 Hamster IgG2, λ1 Isotype Control (Clone: Hlg211)                 | BD Biosciences           | (Cat# 562522, RRID:AB_11153495)    | 0.5 µg/mL  |
| PE/Cyanine7 Rat IgG1, κ Isotype Control (Clone: RTK2071)                  | Biolegend                | (Cat# 400416, RRID:AB_326522)      | 1 µg/mL    |
| PE/Cyanine7 Rat IgG2a, κ Isotype Control (Clone: RTK275)                  | Biolegend                | (Cat# 400522, RRID:AB_326542)      | 1 µg/mL    |
| PE/Cyanine7 Rat IgG2b, κ Isotype Control (Clone: RTK4530)                 | Biolegend                | (Cat# 400618, RRID:AB_326560)      | 0.4 µg/mL  |
| PE/Cyanine7 Mouse IgG2b, κ Isotype Control (Clone: MPC-11)                | Biolegend                | (Cat# 400325, RRID:AB_2923259)     | 0.5 µg/mL  |
| PE/Dazzle 594 Rat IgG2a, κ Isotype Control (Clone: RTK2758)               | Biolegend                | (Cat# 400557, RRID:AB_2923260)     | 1 µg/mL    |



|                                                                                 |                          |                                     |            |
|---------------------------------------------------------------------------------|--------------------------|-------------------------------------|------------|
| PE/Dazzle 594 Rat IgG2b, κ Isotype Control (Clone: RTK4530)                     | Biolegend                | (Cat# 400660, RRID: AB_3096021)     | 0.5 µg/mL  |
| PE/Dazzle 594 Mouse IgG1, κ Isotype Control (Clone: MOPC-21)                    | Biolegend                | (Cat# 400175, RRID:AB_2923261)      | 0.06 µg/mL |
| PerCP/Cyanine5.5 Rat IgG2a, κ Isotype Control (Clone: RTK2758)                  | Biolegend                | (Cat# 400531, RRID:AB_2864286)      | 1 µg/mL    |
| PerCP/Cyanine5.5 Rat IgG1, κ Isotype Control (Clone: RTK2071)                   | Biolegend                | (Cat# 400425, RRID:AB_893689)       | 1 µg/mL    |
| PerCP/Cyanine5.5 Rat IgM, κ Isotype Ctrl Antibody (Clone: RTK2118)              | Biolegend                | (Cat# 400815, RRID:AB_2230100)      | 1 µg/mL    |
| PerCP/Cyanine5.5 Mouse IgG2a, κ Isotype Ctrl Antibody (Clone: MOPC-173)         | Biolegend                | (Cat# 400258, RRID:AB_893689)       | 2 µg/mL    |
| Anti-Mouse IgG (H+L) Cross-Adsorbed Secondary Antibody HRP coupled (Polyclonal) | Thermo Fisher Scientific | (Cat# G-21040, RRID:AB_2536527)     | 0.1 µg/mL  |
| Anti-Mouse IgM Heavy Chain Antibody HRP Conjugated (Polyclonal)                 | Bethyl Laboratories      | Cat# A90-101P, RRID:AB_67189)       | 0.1 µg/mL  |
| Anti-mouse CD16/CD32 (Clone: 2.4G2)                                             | BioXCell                 | (Cat# BE0307, RRID:AB_2736987)      | 10 µg/mL   |
| Anti-mouse CD3ε F(ab') <sub>2</sub> fragment (Clone: 145-2C11)                  | BioXCell                 | (Cat# BE0001-1FAB, RRID:AB_2687679) | 0.5 µg/mL  |
| Anti-mouse CD28 (Clone: PV-1)                                                   | BioXCell                 | (Cat# BE0015-5, RRID:AB_1107628)    | 0.5 µg/mL  |
| Anti-human CD3 (Clone: OKT3)                                                    | Thermo Fisher Scientific | (Cat# 16-0037-81, RRID:AB_468854)   | 5 µg/mL    |
| Anti-human/monkey CD28 (Clone: CD28.2)                                          | BioXCell                 | (Cat# BE0291, RRID:AB_2687814)      | 2 µg/mL    |
| Purified Anti-mouse CD279 (PD-1) (Clone: 29F.1A12)                              | Biolegend                | (Cat# 135202, RRID:AB_1877121)      | 10 µg/mL   |
| Purified Anti-human CD279 (PD-1) (Clone: EH12.2H7)                              | Biolegend                | (Cat# 329902, RRID:AB_940488)       | 10 µg/mL   |
| Purified Mouse IgG1, κ Isotype Control (Clone: MOPC-21)                         | Biolegend                | (Cat# 400102, RRID:AB_2891079)      | 10 µg/mL   |
| Purified Anti-human IL-6 (Clone: MQ2-39C3)                                      | Biolegend                | (Cat# 501204, RRID:AB_2296206)      | 5 µg/mL    |
| Purified Anti-human IL-4 Antibody (Clone: MP4-25D2)                             | Biolegend                | (Cat# 500802, RRID:AB_315121)       | 5 µg/mL    |
| Purified Rat IgG1, κ Isotype Control (Clone: RTK2071)                           | Biolegend                | (Cat# 400402, RRID:AB_326508)       | 5 µg/mL    |
| Purified anti-mMCP-8 Antibody                                                   | Biolegend                | (Cat# 647402, RRID: AB_2290790)     | 5 µg/mL    |
| Ultra-LEAF Purified anti-mouse IL-4 Antibody (clone 11B11)                      | Biolegend                | (Cat# 504135, RRID:AB_2750404)      | 100 µg     |
| Ultra-LEAF Purified anti-mouse IL-3 Antibody                                    | Biolegend                | (Cat# 503911, RRID: AB_2890852)     | 50 µg      |

| Chemicals, peptides, and recombinant proteins                        |                          |                     |
|----------------------------------------------------------------------|--------------------------|---------------------|
| Diphtheria Toxin, Unnicked, Corynebacterium diphtheriae - Calbiochem | Sigma-Aldrich            | Catalog # 322326    |
| DPBS, 10x, no calcium, no magnesium                                  | Thermo Fisher Scientific | Catalog # 14200-067 |

|                                                           |                          |                                      |
|-----------------------------------------------------------|--------------------------|--------------------------------------|
| PBS, pH 7.2                                               | Thermo Fisher Scientific | Catalog # 20012-019                  |
| Imject Alum Adjuvant                                      | Thermo Fisher Scientific | Catalog # 77161                      |
| Tween 20, 100% Nonionic Detergent                         | Bio-Rad                  | Catalog # 1706531; CAS: 9005-64-5    |
| Sm/RNP Complex Antigen affinity purified                  | ImmunoVision             | Catalog # SRC-3000                   |
| Deoxyribonucleic acid sodium salt from calf thymus        | Sigma-Aldrich            | Catalog # D1501; CAS: 73049-39-5     |
| Goat Serum Donor Herd                                     | Sigma-Aldrich            | Catalog # G6767                      |
| Pierce DNA Coating Solution                               | Thermo Fisher Scientific | Catalog # 17250                      |
| Albumin from chicken egg white                            | Sigma-Aldrich            | Catalog # A5503; CAS: 9006-59-1      |
| Trypan Blue Solution, 0.4%                                | Thermo Fisher Scientific | Catalog # 15250-061                  |
| RPMI 1640 Medium, GlutaMAX Supplement, HEPES              | Thermo Fisher Scientific | Catalog # 72400-021                  |
| MEM Non-Essential Amino Acids Solution (100X)             | Thermo Fisher Scientific | Catalog # 11140-035                  |
| Fetal Bovine Serum, qualified, Brazil                     | Thermo Fisher Scientific | Catalog # 10270-106; Lot: 2275142    |
| Penicillin - streptomycin (5 000 U/ml)                    | Thermo Fisher Scientific | Catalog # 15070-063                  |
| Sodium Pyruvate (100 mM)                                  | Thermo Fisher Scientific | Catalog # 11360-039                  |
| 2-Mercaptoethanol                                         | Sigma-Aldrich            | Catalog # M6250-100ML; CAS: 60-24-2  |
| EDTA UltraPure 0.5M, pH de 8,0                            | Thermo Fisher Scientific | Catalog # 15575-020                  |
| Phorbol 12-myristate 13-acetate                           | Sigma-Aldrich            | Catalog # P8139-1MG; CAS: 16561-29-8 |
| Ionomycin from Streptomyces conglobatus                   | Sigma-Aldrich            | Catalog # I9657-1MG; CAS: 56092-81-0 |
| Brefeldin A                                               | Sigma-Aldrich            | Catalog # B7651; CAS: 20350-15-6     |
| Pristane                                                  | Sigma-Aldrich            | Catalog # P2870; CAS: 1921-70-6      |
| Heparin sodium salt from porcine intestinal mucosa        | Sigma-Aldrich            | Catalog # H4784; CAS: 9041-08-1      |
| Rat Sprague Dawley IgG Affinity Purified                  | Innovative Research      | Catalog # IRTSDIGGAP50MG             |
| Hamster Armenian IgG Affinity Purified                    | Innovative Research      | Catalog # IHMARIGG50MG               |
| Human IgG Affinity Purified                               | Innovative Research      | Catalog # IHUIGGAP1000MG             |
| Goat IgG Fractionated Purified Lyophilized                | Innovative Research      | Catalog # IGTIGGGFLY1GM              |
| OCT embedding cryoembedding Matrix                        | Thermo Fisher Scientific | Catalog # LAMB/OCT                   |
| Ghost Dye Violet 510                                      | Tonbo                    | Catalog # 13-0870-T100               |
| Streptavidin, Alexa Fluor 594 conjugate                   | Thermo Fisher Scientific | Catalog # S11227                     |
| Streptavidin, Alexa Fluor 647 conjugate                   | Thermo Fisher Scientific | Catalog # S21374                     |
| Streptavidin, APC/Cy7 conjugate                           | Biolegend                | Catalog # 405208                     |
| UltraComp eBeads Plus Compensation Beads                  | Thermo Fisher Scientific | Catalog # 01-3333-42                 |
| MagniSort Streptavidin Negative Selection Beads           | Thermo Fisher Scientific | Catalog # MSNB-6002-74               |
| Intracellular Staining Permeabilization Wash Buffer (10X) | Biolegend                | Catalog # 421002                     |
| Fixation Buffer                                           | Biolegend                | Catalog # 420801                     |
| Recombinant Murine IL-3                                   | Peptotech                | Catalog # 213-13                     |
| Recombinant Human IL-3 (carrier-free)                     | Biolegend                | Catalog # 578006                     |

|                                                              |                                                                         |                        |
|--------------------------------------------------------------|-------------------------------------------------------------------------|------------------------|
| Recombinant Mouse PD-1 (CD279)-Fc Chimera (carrier-free)     | Biolegend                                                               | Catalog # 764802       |
| Recombinant Murine IL-4                                      | Biolegend                                                               | Catalog # 574302       |
| Prostaglandin D2                                             | Cayman Chemicals                                                        | Catalog # 12010-366033 |
| BD Cytotfix/Cytoperm Kit                                     | BD Biosciences                                                          | Cat# 554714            |
| EasySep Mouse Pan-B Cell Isolation Kit                       | Stemcell Technologies                                                   | Cat# 19844             |
| EasySep Mouse CD4+ T Cell Isolation Kit                      | Stemcell Technologies                                                   | Cat# 19852             |
| Sulfo-NHS-LC-Biotine EZ-Link                                 | Thermo Fisher Scientific                                                | Cat# 21335             |
| <b>Commercial assays</b>                                     |                                                                         |                        |
| eBioscience Foxp3 / Transcription Factor Staining Buffer Set | Thermo Fisher Scientific                                                | Catalog # 00-5523-00   |
| EasySep Human Naïve CD4+ T Cell Isolation Kit                | Stemcell Technologies                                                   | Catalog # 19555        |
| EasySep Human Basophil Isolation Kit                         | Stemcell Technologies                                                   | Catalog # 17969        |
| EasySep Mouse Naïve CD4+ T Cell Isolation Kit                | Stemcell Technologies                                                   | Catalog # 19765        |
| SsoAdvanced Universal SYBR Green Supermix                    | Bio-Rad                                                                 | Catalog # 172-5274     |
| iScript cDNA Synthesis Kit                                   | Bio-Rad                                                                 | Catalog # 170-8891     |
| IL-3 Mouse ELISA Kit                                         | Thermo Fisher Scientific                                                | Catalog # EMIL3        |
| <b>Experimental models:</b>                                  |                                                                         |                        |
| Mouse: B6.129P2-Gt(ROSA) <sup>26Sortm1(DTA)lky/j</sup>       | The Jackson Laboratory                                                  | RRID:IMSR_JAX:009669   |
| Mouse: Il4 <sup>flox/flox</sup> C57BL/6                      | Shibata et al. Proc Natl Acad Sci USA. 2018 Dec 18;115(51):13057-13062. | N/A                    |
| Mouse: Cd274loxP (PD-L1 <sup>flox/flox</sup> ) C57BL/6       | Schwartz et al. J Exp Med. 2017 Sep 4;214(9):2507-2521.                 | N/A                    |
| Mouse: Il-6 <sup>flox/flox</sup> C57BL/6                     | Quintana et al. Brain Behav Immun. 2013 Jan;27(1):162-73.               | N/A                    |
| Mouse: Mcpt8 <sup>Cre-tdTomato</sup> C57BL/6                 | Tchen et al. Front Immunol. 2022 Jun 29;13:900532.                      | N/A                    |
| Mouse: Mcpt8 <sup>DTR</sup> C57BL/6                          | Wada et al. J Clin Invest. 2010 Aug;120(8):2867-75.                     | N/A                    |
| Mouse: B6.129S4-Lyn <sup>tm1Sor/j</sup>                      | The Jackson Laboratory                                                  | RRID:IMSR_JAX:003515   |
| Mouse: B6.129S4-Lyn <sup>tm1Sor/j</sup> Mcpt8 <sup>DTR</sup> | Pellefigues et al. Nat Commun. 2018 Feb 20;9(1):725.                    | N/A                    |
| <b>Oligonucleotides</b>                                      |                                                                         |                        |
| Merck qPCR primers were KiCqStart SYBR Green Primers         | Merck / Sigma-Aldrich                                                   | Cat. # KSPQ12012       |
| Actin b Forward 5'- GATGTATGAAGGCTTTGGTC -3'                 | Merck / Sigma-Aldrich                                                   | Cat. # M_Actb_1        |
| Actin b Reverse 5'- TGTGCACTTTTATTGGTCTC -3'                 | Merck / Sigma-Aldrich                                                   | Cat. # M_Actb_1        |
| Batf Forward 5'- AAAATGACAAGTCAACCCCTG -3'                   | Merck / Sigma-Aldrich                                                   | Cat. # M_Batf_1        |
| Batf Reverse 5'- TTAGAAAACCTATCCACCCCT -3'                   | Merck / Sigma-Aldrich                                                   | Cat. # M_Batf_1        |
| Bcl6 Forward 5'- GAAACCTTACCATTGTGAGAAG -3'                  | Merck / Sigma-Aldrich                                                   | Cat. # M_Bcl6_1        |
| Bcl6 Reverse 5'- GAACACTCCATGCTTCATTC -3'                    | Merck / Sigma-Aldrich                                                   | Cat. # M_Bcl6_1        |
| Gata3 Forward 5'- TATTAACAGACCCTGACTATG -3'                  | Merck / Sigma-Aldrich                                                   | Cat. # M_Gata3_1       |
| Gata3 Reverse 5'- CACCTTTTTGCACTTTTTTCG -3'                  | Merck / Sigma-Aldrich                                                   | Cat. # M_Gata3_1       |
| Maf Forward 5'- CAAGGAGAAATACGAGAAGC -3'                     | Merck / Sigma-Aldrich                                                   | Cat. # M_Maf_1         |
| Maf Reverse 5'- TCACATGAAAAATTCGGGAG -3'                     | Merck / Sigma-Aldrich                                                   | Cat. # M_Maf_1         |

|                                              |                                                                                                   |                         |
|----------------------------------------------|---------------------------------------------------------------------------------------------------|-------------------------|
| Prdm1 Forward 5'- AACAGCAAAGAGGTTATTGG -3'   | Merck / Sigma-Aldrich                                                                             | Cat. # M_Prdm1_1        |
| Prdm1 Reverse 5'- GGAACTCTCTCTGGAATAG -3'    | Merck / Sigma-Aldrich                                                                             | Cat. # M_Prdm1_1        |
| Cxcr5 Forward 5'-ATGACCTGTACAAGGAACTG-3'     | Merck / Sigma-Aldrich                                                                             | Cat. # M_Cxcr5_1        |
| Cxcr5 Reverse 5'-CAGGATGTTCCCATCATAAC-3'     | Merck / Sigma-Aldrich                                                                             | Cat. # M_Cxcr5_1        |
| Bach2 Forward 5'- TGTAGCCTTCTCATCTCTTCCT -3' | Integrated DNA Tech.                                                                              | Cat. #                  |
| Bach2 Reverse 5'- ATCCACAGACATGCCGTTTC -3'   | Integrated DNA Tech.                                                                              | Mm.PT.58.12332872       |
| <b>Software and algorithms</b>               |                                                                                                   |                         |
| FlowJo v10.8.1                               | Tree Star / BD Biosciences                                                                        | FlowJo (RRID:SCR_00852) |
| BD FACSDiva Software v8.0                    | BD Biosciences                                                                                    | (RRID:SCR_00145)        |
| Graphpad Prism v9.4 – v10.2                  | Graphpad                                                                                          | (RRID:SCR_00279)        |
| ImageJ v1.43u and v1.54f                     | NIH - Schneider et al. Nat Methods. 2012 Jul;9(7):671-5.                                          | (RRID:SCR_00307)        |
| CellSens Dimensions 1.4 (Build 8583)         | Olympus                                                                                           | (RRID:SCR_01455)        |
| QuPath v.0.5                                 | Queens University Belfast; Northern Ireland; UK – Bankhead et al. Sci Rep. 2017 Dec; 7(1): 16878. | (RRID:SCR_018257)       |
| Zen 2.1 software (v11.0.4.19)                | Zeiss                                                                                             | (RRID:SCR_013672)       |
| Leica Application Suite X (v3.5.5.19976)     | Leica                                                                                             | (RRID:SCR_013673)       |
| <b>Other</b>                                 |                                                                                                   |                         |
| BD LSRFortessa X-20 Cell Analyzer            | BD Biosciences                                                                                    | N/A                     |
| BD FACSMelody Cell Sorter                    | BD Biosciences                                                                                    | (RRID:SCR_023209)       |
| BD LSRFortessa Cell Analyzer                 | BD Biosciences                                                                                    | (RRID:SCR_019601)       |
| Leica DM IRB Inverted microscope             | Leica                                                                                             | N/A                     |
| Video camera microscope attachment           | Hamamatsu                                                                                         | ORCA-03G02              |
| CFX96 Touch Real-Time PCR Detection System   | Bio-Rad                                                                                           | (RRID:SCR_018064)       |
| Fluorescence microplate reader               | TECAN                                                                                             | SPARK 10M               |
